# Supplementary material for: Medicaid Policy Change and Immediate Postpartum Long-Acting Reversible Contraception
Source: PubMed Central journal article supplement (PMC11161841; doi:10.1001/jamahealthforum.2024.1359), 2024-06-07
Supplement: jamahealthforum-e241359-s001.pdf [file jamahealthforum-e241359-s001.pdf]

## Supplemental Online Content

Rodriguez MI, Meath TA, Watson K, Daly A, McConnell KJ, Kim H. Medicaid policy change and immediate postpartum long-acting reversible contraception. *JAMA Health Forum*. Published online June 7, 2024. doi:10.1001/jamahealthforum.2024.1359

**eMethods 1.** Identification of policy implementation waves

**eFigure 1.** Flowchart describing process for identifying policy dates

**eMethods 2.** State selection

**eTable 1.** Assessment of fully missing eligibility information by state

**eTable 2.** OT claims volume data quality assessment for eligible women ages 18 to 44 who gave birth in 2016-2019

**eTable 3.** RX claims volume data quality assessment for eligible women ages 18 to 44 who gave birth in 2016-2019

**eMethods 3.** Staggered Difference-in-differences model specification

**eMethods 4.** Unadjusted time trends for secondary outcomes

**eFigure 2.** Unadjusted monthly rates of Interval LARC over time stratified by policy implementation waves

**eFigure 3.** Unadjusted monthly rates of 7-day postpartum sterilization over time stratified by policy implementation wave

**eFigure 4.** Unadjusted monthly rates of 7-day most or moderately effective contraception use over time stratified by policy implementation wave

**eMethods 5.** Assessing parallel pre-trends for IPP LARC

**eTable 4.** Differences in pre-policy trends of IPP LARC by wave

**eMethods 6.** Sensitivity Analysis for IPP LARC models

**eFigure 5.** Estimated changes each month pre- and post-policy on use of raw IPP LARC rate

**eFigure 6.** Estimated changes associated with the policy for each policy implementation wave on use of raw IPP LARC

**eMethods 7.** Month-stratified and wave-stratified results for secondary outcomes

**eFigure 7.** Estimated changes each month pre- and post-policy on use of 60-day postpartum LARC

**eFigure 8.** Estimated changes associated with the policy for each policy implementation wave on use of 60-day postpartum LARC

**eFigure 9.** Estimated changes each month pre- and post-policy on use of 7-day postpartum sterilization

**eFigure 10.** Estimated changes associated with the policy for each policy implementation wave on use of 7-day postpartum sterilization

**eFigure 11.** Estimated changes each month pre- and post-policy on use of 7-day postpartum most or moderately effective contraception

**eFigure 12.** Estimated changes associated with the policy for each policy implementation wave on use of 7-day postpartum most or moderately effective contraception

**eMethods 8.** Assessing parallel pre-trends for Secondary Outcomes

**eTable 5.** Differences in pre-policy trends of Interval LARC by wave

**eTable 6.** Differences in pre-policy trends of 7-day postpartum sterilization by wave

**eTable 7.** Differences in pre-policy trends of 7-day postpartum most or moderately effective contraception by wave

**eMethods 9.** Sensitivity Analysis for Interval LARC models

**eFigure 13.** Estimated changes each month pre- and post-policy on use of raw IPP LARC rate

**eFigure 14.** Estimated changes associated with the policy for each policy implementation wave on use of raw IPP LARC

**eMethods 10.** Sensitivity Analysis for 7-day postpartum sterilization models

**eFigure 15.** Estimated changes each month pre- and post-policy on use of raw IPP LARC rate

**eFigure 16.** Estimated changes associated with the policy for each policy implementation wave on use of raw IPP LARC

**eMethods 11.** Sensitivity Analysis for 7-day postpartum most or moderately effective contraception models

**eFigure 17.** Estimated changes each month pre- and post-policy on use of raw IPP LARC rate

**eFigure 18.** Estimated changes associated with the policy for each policy implementation wave on use of raw IPP LARC

## **eReferences.**

This supplemental material has been provided by the authors to give readers additional information about their work.

## Supplement Section 1. Identification of policy implementation waves

A team of policy analysts performed a review of state policies to identify start dates for state Medicaid policies that allowed for separate reimbursement for immediate postpartum long-acting reversible contraception (LARC) in hospital settings. Only states with sufficient data quality as measured using DQ Atlas assessments (Supplement Section 2) were reviewed. The steps used to identify policies and start dates is described below and in Supplement Figure 1. Full details of the policy review results for each state is provided in Supplement Table 1.

**1. For each state, we checked for LARC device reimbursement policies on three websites.** We compared responses for consistency.

- A. **MACPAC** – (3/2020) Mathematica, under contract, compiled a spreadsheet of Medicaid Initiatives in states including LARC policies with start dates and original language<sup>1</sup>.
- B. **DHHS CMS Informational Bulletin** (4/8/16) - a state agency policy scan of innovative state LARC reimbursement strategies<sup>2</sup>.
- C. **ACOG Website** – (updated 4/2022) -compiled links to state agency Medicaid LARC policies<sup>3</sup>.

**2. If no specific policy information was available, we performed an Internet search for policies** using various search terms combinations including “State” “Medicaid,” “LARC,” “Hospital,” “Inpatient,” “Reimbursement,” “IUD,” and “Device.”

**3. We prioritized using original source text from state Medicaid agency policy guidelines, rules and bulletins on LARC reimbursement to determine policy start date and policy details.** The next priority level was using information from secondary sources, such as policy scans from MACPAC, a research publication, or other policy summary. In two instances, ID and NV, we contacted state Medicaid agencies to get clarity on policy information.

**4. To validate our findings, we compared KFF surveys on State Medicaid Coverage for LARC Reimbursement for 2015<sup>4</sup> and 2021<sup>5</sup>.** These surveys indicated whether LARC device reimbursement was separate or global (under the maternity global DRG) for both hospital and provider reimbursement. Although survey data usually corresponded with our findings, there were several instances when the responses contradicted with original state Medicaid agency policy guidance. KFF seemed generally accurate, but not completely reliable. Other limitations of KFF data were checkbox responses only (separate/global) and no indication of policy start dates.

**5. We noted, under “Summary,” state agency policy start dates based on original/secondary state agency policy documentation, prioritized finding hospital reimbursement policies, and noted when KFF had contradictory or additional info., not found in our policy scan.** For example, we indicated the policy start date for Oregon was 1/1/17, based on state health authority information of separate hospital reimbursement for postpartum LARC. If we found state agency policy guidance on a separate hospital

reimbursement policy, we did not search for a separate provider reimbursement policy. In our summary, we use policy start date of 1/1/17 for hospital reimbursement and noted that provider reimbursement might have started in 2015 or earlier per KFF surveys.

**6. Based on the information found in steps 1-5, the principle investigator assigned each state to one of three groups:** (1) Treatment states – those that implemented a policy during the study period, (2) Control states – states that did not implement the policy or implemented the policy following the end of the study period, (3) Excluded states – those that either implemented the policy prior to the start of the study period or those that could not be classified into the other two groups.

Supplement eFigure 1. Flowchart describing process for identifying policy dates

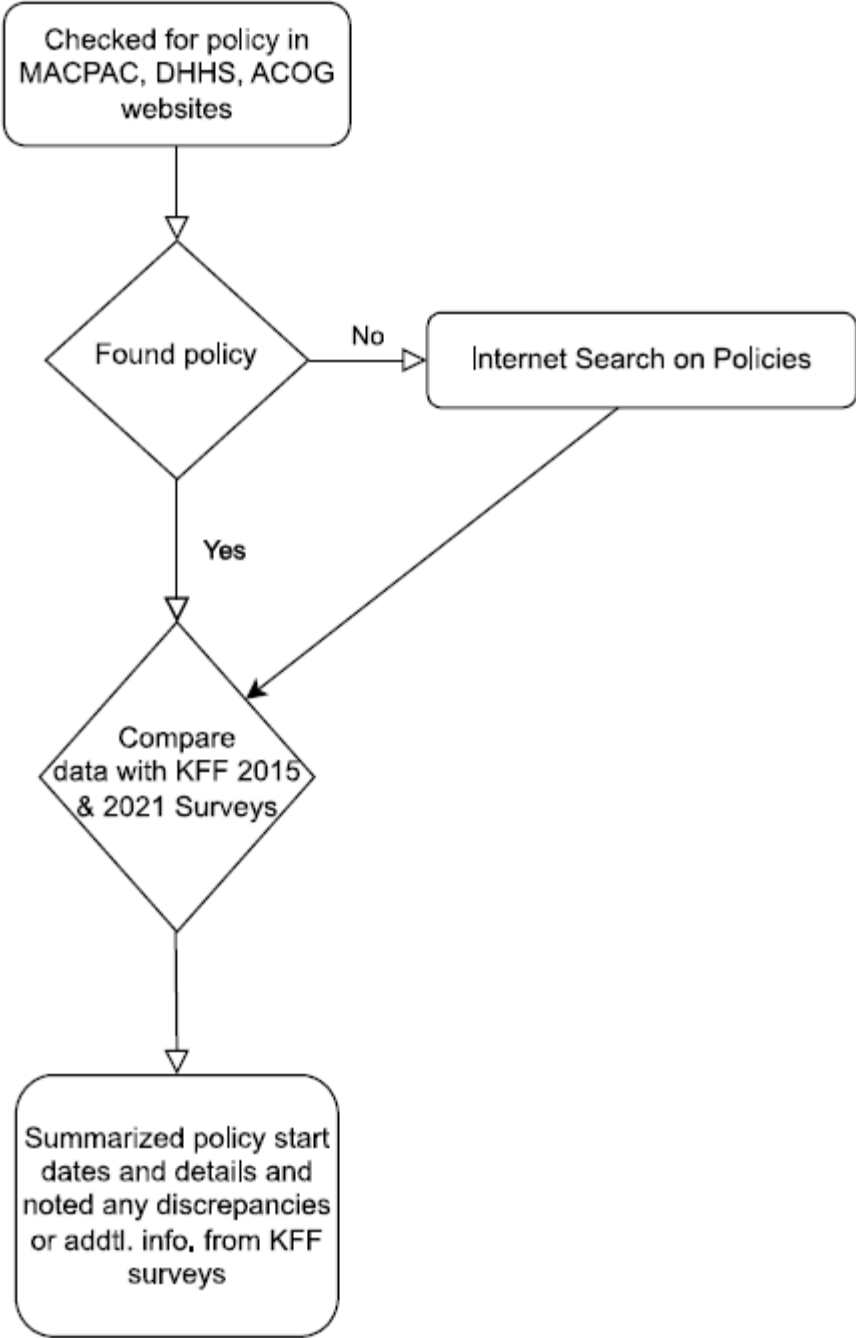

## Supplement Section 2. State selection

To select states with adequate data quality for analysis we used assessments published by the Centers for Medicare & Medicaid Services DQ Atlas<sup>6</sup> and supplemented our own analyses of the data quality where necessary. We began with all 50 states and the District of Columbia and looked at data quality assessments for TAF RIF Release 2 from 2016, 2017, and 2018 and TAF RIF Release 1 from 2019.

After excluding 22 states that had already implemented an IPP LARC separate billing policy prior to 2016 (Arizona, California, Connecticut, Delaware, Georgia, Hawaii, Idaho, Illinois, Indiana, Iowa, Louisiana, Missouri, Montana, New Mexico, New York, Oklahoma, Pennsylvania, South Carolina, South Dakota, Texas, Vermont, Washington) and 4 states and territories with an unclear policy or policy date (Alaska, District of Columbia, Massachusetts, Nevada), 25 states remained for data quality assessment.

Six states classified as unusable or high concern in any of the relevant assessments for any of the measurement years were excluded from our analysis:

- 2 states with high concern Total Medicaid and CHIP Enrollment (Maine and Rhode Island).
- 2 states with unusable procedure codes on inpatient claims (Kentucky and Maryland).
- 1 state with unusable diagnosis codes on inpatient claims (Tennessee).
- 1 state with unusable procedure codes on professional Other Services claims (Utah).

To assess the remaining 19 states, we conducted two additional assessments of overall TAF data quality. First, we looked at the proportion of enrollment records missing all eligibility information (MISG\_ELGLTY\_DATA\_IND = 1) and classified states from Low Concern to Unusable based on the same cut-points used in the DQ Atlas assessments of missing gender and missing age on enrollment records (Supplement eTable 2).

Second, we calculated the Claims Volume assessments for our population of interest (Supplement eTable 3 and eTable 4). Because variation in claims volume is not necessarily a sign of poor data quality but may still flag problematic states, we only considered those states classified as unusable on this measure for exclusion.

From these assessments we excluded an additional four states:

- 2 states with high concern (> 20%) missing eligibility records (Alabama and Arkansas)
- 1 state with unusable Other Services (OT) claims volume in our population (Florida)
- 1 state with unusable pharmacy (RX) claims volume in our population (Mississippi)

In total we excluded 35 states and the District of Columbia from analysis based on inadequate data quality or IPP LARC policies. Our remaining cohort included 15 states (Colorado, Kansas, Michigan, Minnesota, Nebraska, New Hampshire, New Jersey, North Carolina, North Dakota, Ohio, Oregon, Virginia, West Virginia, Wisconsin, Wyoming).

Supplement eTable 1. Assessment of fully missing eligibility information by state

| Year | State                | DQ Assessment  | # Beneficiaries | % Beneficiaries with Missing Eligibility Record |
|------|----------------------|----------------|-----------------|-------------------------------------------------|
| 2016 | Alabama              | Medium concern | 1,505,574       | 10.5                                            |
| 2016 | Alaska               | Low concern    | 209,614         | 0.1                                             |
| 2016 | Arizona              | Low concern    | 2,407,731       | 1.3                                             |
| 2016 | Arkansas             | High concern   | 1,674,720       | 30.4                                            |
| 2016 | California           | Low concern    | 18,314,987      | 2.2                                             |
| 2016 | Colorado             | Low concern    | 1,656,088       | 0.4                                             |
| 2016 | Connecticut          | Low concern    | 1,064,823       | 0.1                                             |
| 2016 | Delaware             | Low concern    | 296,083         | 0.2                                             |
| 2016 | District of Columbia | Low concern    | 285,341         | 0.7                                             |
| 2016 | Florida              | Low concern    | 5,254,568       | 1.3                                             |
| 2016 | Georgia              | Low concern    | 2,497,727       | 0.1                                             |
| 2016 | Hawaii               | Low concern    | 424,949         | 0.4                                             |
| 2016 | Idaho                | Low concern    | 373,052         | 2.1                                             |
| 2016 | Illinois             | Low concern    | 3,766,853       | 0.6                                             |
| 2016 | Indiana              | Low concern    | 1,865,381       | 1                                               |
| 2016 | Iowa                 | Low concern    | 864,440         | 5.3                                             |
| 2016 | Kansas               | Low concern    | 521,091         | 0.4                                             |
| 2016 | Kentucky             | Low concern    | 1,658,555       | 0.2                                             |
| 2016 | Louisiana            | Low concern    | 1,748,158       | 0                                               |
| 2016 | Maine                | Low concern    | 331,147         | 0                                               |
| 2016 | Maryland             | Low concern    | 1,537,892       | 0.1                                             |
| 2016 | Massachusetts        | Low concern    | 2,275,071       | 1.6                                             |
| 2016 | Michigan             | Low concern    | 3,115,922       | 6.1                                             |
| 2016 | Minnesota            | Low concern    | 1,432,163       | 2.8                                             |
| 2016 | Mississippi          | Low concern    | 913,766         | 0.3                                             |
| 2016 | Missouri             | Low concern    | 1,236,569       | 0.4                                             |
| 2016 | Montana              | Low concern    | 284,454         | 2.7                                             |
| 2016 | Nebraska             | Low concern    | 306,932         | 0.2                                             |
| 2016 | Nevada               | Low concern    | 846,124         | 0.6                                             |
| 2016 | New Hampshire        | Low concern    | 260,814         | 0.1                                             |
| 2016 | New Jersey           | Low concern    | 2,234,871       | 5.2                                             |
| 2016 | New Mexico           | Low concern    | 972,603         | 0.1                                             |
| 2016 | New York             | Low concern    | 8,004,690       | 0.1                                             |
| 2016 | North Carolina       | Low concern    | 2,427,017       | 0.3                                             |
| 2016 | North Dakota         | Low concern    | 124,855         | 0.6                                             |
| 2016 | Ohio                 | Low concern    | 3,651,749       | 4.3                                             |
| 2016 | Oklahoma             | Low concern    | 1,045,953       | 2                                               |
| 2016 | Oregon               | Low concern    | 1,429,788       | 0.2                                             |



|      |                      |                |            |      |
|------|----------------------|----------------|------------|------|
| 2016 | Pennsylvania         | Low concern    | 3,457,135  | 3.8  |
| 2016 | Rhode Island         | Low concern    | 361,841    | 0.3  |
| 2016 | South Carolina       | Low concern    | 1,420,355  | 0.4  |
| 2016 | South Dakota         | Low concern    | 155,372    | 0.1  |
| 2016 | Tennessee            | Low concern    | 1,823,196  | 1.5  |
| 2016 | Texas                | Low concern    | 6,130,716  | 2.9  |
| 2016 | Utah                 | Low concern    | 449,705    | 1.8  |
| 2016 | Vermont              | Low concern    | 227,475    | 0.2  |
| 2016 | Virginia             | Low concern    | 1,441,406  | 0.9  |
| 2016 | Washington           | Low concern    | 2,209,083  | 0.3  |
| 2016 | West Virginia        | Low concern    | 702,053    | 1.2  |
| 2016 | Wisconsin            | Low concern    | 1,440,341  | 1.5  |
| 2016 | Wyoming              | Low concern    | 106,963    | 0.1  |
| 2017 | Alabama              | Medium concern | 1,583,388  | 14.7 |
| 2017 | Alaska               | Low concern    | 233,670    | 0    |
| 2017 | Arizona              | Low concern    | 2,350,966  | 0.5  |
| 2017 | Arkansas             | High concern   | 1,585,184  | 24.9 |
| 2017 | California           | Low concern    | 17,886,931 | 2.2  |
| 2017 | Colorado             | Low concern    | 1,700,854  | 0.3  |
| 2017 | Connecticut          | Low concern    | 1,086,153  | 0.2  |
| 2017 | Delaware             | Low concern    | 291,772    | 0.1  |
| 2017 | District of Columbia | Low concern    | 287,186    | 0.3  |
| 2017 | Florida              | Low concern    | 5,325,008  | 0.7  |
| 2017 | Georgia              | Low concern    | 2,499,086  | 0.1  |
| 2017 | Hawaii               | Low concern    | 422,411    | 0.9  |
| 2017 | Idaho                | Low concern    | 383,951    | 3    |
| 2017 | Illinois             | Low concern    | 3,682,744  | 0.1  |
| 2017 | Indiana              | Low concern    | 1,823,845  | 0.3  |
| 2017 | Iowa                 | Low concern    | 819,993    | 0.1  |
| 2017 | Kansas               | Low concern    | 521,691    | 0.3  |
| 2017 | Kentucky             | Low concern    | 1,721,085  | 0.4  |
| 2017 | Louisiana            | Low concern    | 1,846,114  | 0    |
| 2017 | Maine                | Low concern    | 324,369    | 0    |
| 2017 | Maryland             | Low concern    | 1,600,579  | 0.1  |
| 2017 | Massachusetts        | Low concern    | 2,272,404  | 0.1  |
| 2017 | Michigan             | Low concern    | 2,944,735  | 0.8  |
| 2017 | Minnesota            | Low concern    | 1,423,050  | 4.3  |
| 2017 | Mississippi          | Low concern    | 899,667    | 0.3  |
| 2017 | Missouri             | Low concern    | 1,266,882  | 0.5  |
| 2017 | Montana              | Low concern    | 379,496    | 0.2  |
| 2017 | Nebraska             | Low concern    | 310,618    | 0.2  |
| 2017 | Nevada               | Low concern    | 869,896    | 0.3  |

|      |                      |                |            |      |
|------|----------------------|----------------|------------|------|
| 2017 | New Hampshire        | Low concern    | 262,401    | 1    |
| 2017 | New Jersey           | Medium concern | 2,397,310  | 11   |
| 2017 | New Mexico           | Low concern    | 1,010,727  | 0.1  |
| 2017 | New York             | Low concern    | 8,102,569  | 0.1  |
| 2017 | North Carolina       | Low concern    | 2,522,552  | 0.5  |
| 2017 | North Dakota         | Low concern    | 127,354    | 0.9  |
| 2017 | Ohio                 | Low concern    | 3,671,348  | 4    |
| 2017 | Oklahoma             | Low concern    | 1,070,786  | 4.2  |
| 2017 | Oregon               | Low concern    | 1,366,394  | 0.1  |
| 2017 | Pennsylvania         | Low concern    | 3,621,605  | 4.6  |
| 2017 | Rhode Island         | Low concern    | 384,188    | 0.2  |
| 2017 | South Carolina       | Low concern    | 1,465,488  | 0.4  |
| 2017 | South Dakota         | Low concern    | 153,838    | 0.1  |
| 2017 | Tennessee            | Medium concern | 2,288,850  | 18.1 |
| 2017 | Texas                | Low concern    | 6,022,153  | 1.4  |
| 2017 | Utah                 | Low concern    | 436,958    | 1.7  |
| 2017 | Vermont              | Low concern    | 209,021    | 0.1  |
| 2017 | Virginia             | Low concern    | 1,445,108  | 0.6  |
| 2017 | Washington           | Low concern    | 2,231,975  | 0.3  |
| 2017 | West Virginia        | Low concern    | 688,009    | 0.4  |
| 2017 | Wisconsin            | Low concern    | 1,402,531  | 8.6  |
| 2017 | Wyoming              | Low concern    | 94,073     | 0.1  |
| 2018 | Alabama              | High concern   | 1,785,528  | 24   |
| 2018 | Alaska               | Low concern    | 246,856    | 0.1  |
| 2018 | Arizona              | Low concern    | 2,324,198  | 0.4  |
| 2018 | Arkansas             | Low concern    | 1,152,527  | 0.6  |
| 2018 | California           | Low concern    | 17,259,966 | 1.9  |
| 2018 | Colorado             | Low concern    | 1,666,828  | 0.6  |
| 2018 | Connecticut          | Low concern    | 1,097,641  | 0.2  |
| 2018 | Delaware             | Low concern    | 294,484    | 0.1  |
| 2018 | District of Columbia | Low concern    | 294,772    | 0.5  |
| 2018 | Florida              | Low concern    | 5,239,274  | 0.3  |
| 2018 | Georgia              | Low concern    | 2,588,750  | 0.7  |
| 2018 | Hawaii               | Low concern    | 418,787    | 1.1  |
| 2018 | Idaho                | Low concern    | 367,388    | 0.1  |
| 2018 | Illinois             | Low concern    | 3,638,871  | 0.2  |
| 2018 | Indiana              | Low concern    | 1,848,347  | 1.4  |
| 2018 | Iowa                 | Low concern    | 809,174    | 0.2  |
| 2018 | Kansas               | Low concern    | 512,851    | 0.3  |
| 2018 | Kentucky             | Low concern    | 1,734,002  | 0.3  |
| 2018 | Louisiana            | Low concern    | 1,867,965  | 0    |
| 2018 | Maine                | Low concern    | 325,405    | 0    |

|             |                      |                |            |      |
|-------------|----------------------|----------------|------------|------|
| 2018        | Maryland             | Low concern    | 1,623,847  | 0.2  |
| 2018        | Massachusetts        | Low concern    | 2,247,777  | 0.1  |
| 2018        | Michigan             | Low concern    | 2,951,026  | 0.6  |
| 2018        | Minnesota            | Low concern    | 1,430,441  | 6.1  |
| 2018        | Mississippi          | Low concern    | 882,116    | 0.3  |
| 2018        | Missouri             | Low concern    | 1,248,554  | 0.4  |
| 2018        | Montana              | Low concern    | 358,779    | 0.1  |
| 2018        | Nebraska             | Low concern    | 312,002    | 0.1  |
| 2018        | Nevada               | Low concern    | 878,600    | 0.3  |
| 2018        | New Hampshire        | Low concern    | 253,238    | 0.2  |
| 2018        | New Jersey           | Medium concern | 2,499,387  | 15.3 |
| 2018        | New Mexico           | Low concern    | 978,618    | 0    |
| 2018        | New York             | Low concern    | 8,198,039  | 0    |
| 2018        | North Carolina       | Low concern    | 2,593,784  | 0.4  |
| 2018        | North Dakota         | Low concern    | 126,386    | 1    |
| 2018        | Ohio                 | Low concern    | 3,462,339  | 1.2  |
| 2018        | Oklahoma             | Low concern    | 1,048,631  | 4.3  |
| 2018        | Oregon               | Low concern    | 1,303,604  | 0.2  |
| 2018        | Pennsylvania         | Low concern    | 3,658,824  | 2.4  |
| 2018        | Rhode Island         | Low concern    | 385,188    | 2.7  |
| 2018        | South Carolina       | Low concern    | 1,469,214  | 0.3  |
| 2018        | South Dakota         | Low concern    | 151,505    | 0.1  |
| 2018        | Tennessee            | High concern   | 2,342,471  | 21.1 |
| 2018        | Texas                | Low concern    | 5,930,218  | 1.1  |
| 2018        | Utah                 | Low concern    | 422,186    | 0.4  |
| 2018        | Vermont              | Low concern    | 201,599    | 0.1  |
| 2018        | Virginia             | Low concern    | 1,496,868  | 0.7  |
| 2018        | Washington           | Low concern    | 2,193,204  | 0.4  |
| 2018        | West Virginia        | Low concern    | 673,058    | 1.2  |
| 2018        | Wisconsin            | Low concern    | 1,391,491  | 0.3  |
| 2018        | Wyoming              | Low concern    | 90,615     | 0.1  |
| <b>2019</b> | Alabama              | High concern   | 1,862,088  | 27.5 |
| 2019        | Alaska               | Low concern    | 257,655    | 0.2  |
| 2019        | Arizona              | Low concern    | 2,284,084  | 0.2  |
| 2019        | Arkansas             | Low concern    | 1,122,655  | 0.7  |
| 2019        | California           | Low concern    | 16,636,071 | 1.4  |
| 2019        | Colorado             | Low concern    | 1,617,745  | 0.9  |
| 2019        | Connecticut          | Low concern    | 1,118,478  | 0.1  |
| 2019        | Delaware             | Low concern    | 294,978    | 0.1  |
| 2019        | District of Columbia | Low concern    | 289,532    | 0.2  |
| 2019        | Florida              | Low concern    | 5,063,676  | 0.7  |
| 2019        | Georgia              | Low concern    | 2,574,731  | 0.1  |

|      |                |              |           |      |
|------|----------------|--------------|-----------|------|
| 2019 | Hawaii         | Low concern  | 406,649   | 1.1  |
| 2019 | Idaho          | Low concern  | 353,386   | 0.1  |
| 2019 | Illinois       | Low concern  | 3,485,221 | 0.3  |
| 2019 | Indiana        | Low concern  | 1,818,487 | 0.2  |
| 2019 | Iowa           | Low concern  | 822,560   | 0    |
| 2019 | Kansas         | Low concern  | 505,416   | 0.2  |
| 2019 | Kentucky       | Low concern  | 1,698,912 | 0.3  |
| 2019 | Louisiana      | Low concern  | 1,892,152 | 0    |
| 2019 | Maine          | Low concern  | 355,047   | 0    |
| 2019 | Maryland       | Low concern  | 1,610,473 | 0.1  |
| 2019 | Massachusetts  | Low concern  | 2,172,070 | 0.2  |
| 2019 | Michigan       | Low concern  | 2,948,236 | 0.6  |
| 2019 | Minnesota      | Low concern  | 1,382,683 | 4.3  |
| 2019 | Mississippi    | Low concern  | 855,885   | 0.2  |
| 2019 | Missouri       | Low concern  | 1,194,625 | 0.3  |
| 2019 | Montana        | Low concern  | 365,311   | 0.1  |
| 2019 | Nebraska       | Low concern  | 310,492   | 0.2  |
| 2019 | Nevada         | Low concern  | 867,619   | 0.2  |
| 2019 | New Hampshire  | Low concern  | 248,299   | 0.1  |
| 2019 | New Jersey     | Low concern  | 2,173,180 | 3.9  |
| 2019 | New Mexico     | Low concern  | 952,111   | 0    |
| 2019 | New York       | Low concern  | 8,281,504 | 0.1  |
| 2019 | North Carolina | Low concern  | 2,619,089 | 0.4  |
| 2019 | North Dakota   | Low concern  | 123,678   | 0.9  |
| 2019 | Ohio           | Low concern  | 3,331,426 | 0.9  |
| 2019 | Oklahoma       | Low concern  | 1,036,476 | 4.3  |
| 2019 | Oregon         | Low concern  | 1,309,103 | 0.1  |
| 2019 | Pennsylvania   | Low concern  | 3,667,935 | 1.5  |
| 2019 | Rhode Island   | High concern | 380,347   | 24.1 |
| 2019 | South Carolina | Low concern  | 1,460,877 | 0.2  |
| 2019 | South Dakota   | Low concern  | 148,441   | 0.2  |
| 2019 | Tennessee      | High concern | 2,278,950 | 22.7 |
| 2019 | Texas          | Low concern  | 5,760,195 | 0.6  |
| 2019 | Utah           | Low concern  | 424,428   | 0.2  |
| 2019 | Vermont        | Low concern  | 194,696   | 0.1  |
| 2019 | Virginia       | Low concern  | 1,779,562 | 0.9  |
| 2019 | Washington     | Low concern  | 2,149,654 | 0.2  |
| 2019 | West Virginia  | Low concern  | 666,570   | 2.4  |
| 2019 | Wisconsin      | Low concern  | 1,375,678 | 0.3  |
| 2019 | Wyoming        | Low concern  | 87,941    | 0.2  |

Supplement eTable 2. OT claims volume data quality assessment for eligible women ages 18 to 44 who gave birth in 2016-2019

| State                | Data Year | DQ Assessment  | Assessment of OT File Header Record Volume | Assessment of OT File Line Record Volume | Assessment of Avg OT Line Records per Header | OT File Header Records per 1,000 Enrolled Months as % of National Median | OT File Line Records per 1,000 Enrolled Months as % of National Median | Avg OT File Line Records per Header Record as % of National Median | OT File Header Records per 1,000 Enrolled Months | National Median: Header Records per 1,000 Enrolled Months in OT File | OT File Line Records per 1,000 Enrolled Months | National Median: Line Records per 1,000 Enrolled Months in OT File | Avg OT File Line Records per Header Record | National Median: Avg Line Records per Header in OT File |
|----------------------|-----------|----------------|--------------------------------------------|------------------------------------------|----------------------------------------------|--------------------------------------------------------------------------|------------------------------------------------------------------------|--------------------------------------------------------------------|--------------------------------------------------|----------------------------------------------------------------------|------------------------------------------------|--------------------------------------------------------------------|--------------------------------------------|---------------------------------------------------------|
| Alabama              | 2016      | Medium concern | Medium concern                             | Medium concern                           | Low concern                                  | 51.1                                                                     | 62.7                                                                   | 114.3                                                              | 1433.2                                           | 2805.0                                                               | 3197.0                                         | 5096.9                                                             | 2.2                                        | 2.0                                                     |
| Alaska               | 2016      | Low concern    | Low concern                                | Low concern                              | Low concern                                  | 108.4                                                                    | 115.8                                                                  | 99.4                                                               | 3041.7                                           | 2805.0                                                               | 5900.6                                         | 5096.9                                                             | 1.9                                        | 2.0                                                     |
| Arizona              | 2016      | Low concern    | Low concern                                | Low concern                              | Low concern                                  | 114.2                                                                    | 89.4                                                                   | 73.0                                                               | 3202.5                                           | 2805.0                                                               | 4558.8                                         | 5096.9                                                             | 1.4                                        | 2.0                                                     |
| Arkansas             | 2016      | High concern   | High concern                               | High concern                             | Low concern                                  | 41.8                                                                     | 48.3                                                                   | 107.6                                                              | 1173.3                                           | 2805.0                                                               | 2462.3                                         | 5096.9                                                             | 2.1                                        | 2.0                                                     |
| California           | 2016      | Low concern    | Low concern                                | Low concern                              | Low concern                                  | 123.5                                                                    | 129.9                                                                  | 98.0                                                               | 3463.3                                           | 2805.0                                                               | 6620.6                                         | 5096.9                                                             | 1.9                                        | 2.0                                                     |
| Colorado             | 2016      | Medium concern | Medium concern                             | Low concern                              | Low concern                                  | 74.7                                                                     | 80.2                                                                   | 100.0                                                              | 2094.7                                           | 2805.0                                                               | 4086.3                                         | 5096.9                                                             | 2.0                                        | 2.0                                                     |
| Connecticut          | 2016      | Low concern    | Low concern                                | Low concern                              | Low concern                                  | 104.3                                                                    | 133.6                                                                  | 119.3                                                              | 2924.5                                           | 2805.0                                                               | 6808.6                                         | 5096.9                                                             | 2.3                                        | 2.0                                                     |
| Delaware             | 2016      | Medium concern | Low concern                                | Medium concern                           | Low concern                                  | 136.1                                                                    | 153.7                                                                  | 105.2                                                              | 3818.6                                           | 2805.0                                                               | 7833.7                                         | 5096.9                                                             | 2.1                                        | 2.0                                                     |
| District of Columbia | 2016      | Low concern    | Low concern                                | Low concern                              | Low concern                                  | 99.3                                                                     | 113.7                                                                  | 106.7                                                              | 2784.2                                           | 2805.0                                                               | 5795.9                                         | 5096.9                                                             | 2.1                                        | 2.0                                                     |
| Florida              | 2016      | Low concern    | Low concern                                | Low concern                              | Low concern                                  | 101.0                                                                    | 110.7                                                                  | 102.1                                                              | 2832.6                                           | 2805.0                                                               | 5642.1                                         | 5096.9                                                             | 2.0                                        | 2.0                                                     |

|               |      |                |                |                |              |       |       |       |        |        |        |        |     |     |
|---------------|------|----------------|----------------|----------------|--------------|-------|-------|-------|--------|--------|--------|--------|-----|-----|
| Georgia       | 2016 | Medium concern | Medium concern | Low concern    | Low concern  | 74.3  | 77.1  | 96.7  | 2083.4 | 2805.0 | 3929.7 | 5096.9 | 1.9 | 2.0 |
| Hawaii        | 2016 | Medium concern | Medium concern | Low concern    | Low concern  | 69.2  | 78.2  | 105.3 | 1940.5 | 2805.0 | 3987.1 | 5096.9 | 2.1 | 2.0 |
| Idaho         | 2016 | Medium concern | Medium concern | Medium concern | Low concern  | 74.8  | 74.3  | 92.5  | 2099.4 | 2805.0 | 3786.7 | 5096.9 | 1.8 | 2.0 |
| Illinois      | 2016 | Low concern    | Low concern    | Low concern    | Low concern  | 106.6 | 98.0  | 85.6  | 2990.8 | 2805.0 | 4995.9 | 5096.9 | 1.7 | 2.0 |
| Indiana       | 2016 | Low concern    | Low concern    | Low concern    | Low concern  | 98.6  | 117.3 | 110.8 | 2765.0 | 2805.0 | 5977.7 | 5096.9 | 2.2 | 2.0 |
| Iowa          | 2016 | Low concern    | Low concern    | Low concern    | Low concern  | 85.4  | 84.4  | 92.0  | 2396.1 | 2805.0 | 4302.0 | 5096.9 | 1.8 | 2.0 |
| Kansas        | 2016 | Low concern    | Low concern    | Low concern    | Low concern  | 75.0  | 80.8  | 100.3 | 2104.1 | 2805.0 | 4117.1 | 5096.9 | 2.0 | 2.0 |
| Kentucky      | 2016 | Low concern    | Low concern    | Low concern    | Low concern  | 103.9 | 108.1 | 97.0  | 2913.1 | 2805.0 | 5511.1 | 5096.9 | 1.9 | 2.0 |
| Louisiana     | 2016 | High concern   | High concern   | Low concern    | Low concern  | 201.9 | 111.7 | 51.6  | 5663.1 | 2805.0 | 5695.1 | 5096.9 | 1.0 | 2.0 |
| Maine         | 2016 | Medium concern | Medium concern | Medium concern | Low concern  | 156.8 | 173.5 | 103.0 | 4398.6 | 2805.0 | 8841.6 | 5096.9 | 2.0 | 2.0 |
| Maryland      | 2016 | High concern   | High concern   | Medium concern | Low concern  | 237.2 | 155.6 | 61.1  | 6653.3 | 2805.0 | 7929.6 | 5096.9 | 1.2 | 2.0 |
| Massachusetts | 2016 | High concern   | High concern   | Low concern    | Low concern  | 207.8 | 134.6 | 60.3  | 5830.0 | 2805.0 | 6859.6 | 5096.9 | 1.2 | 2.0 |
| Michigan      | 2016 | Low concern    | Low concern    | Low concern    | Low concern  | 100.3 | 124.5 | 115.6 | 2814.4 | 2805.0 | 6344.6 | 5096.9 | 2.3 | 2.0 |
| Minnesota     | 2016 | Low concern    | Low concern    | Low concern    | Low concern  | 107.4 | 128.4 | 111.3 | 3014.0 | 2805.0 | 6543.4 | 5096.9 | 2.2 | 2.0 |
| Mississippi   | 2016 | High concern   | Low concern    | High concern   | High concern | 80.6  | 17.4  | 20.1  | 2261.1 | 2805.0 | 888.8  | 5096.9 | 0.4 | 2.0 |
| Missouri      | 2016 | Low concern    | Low concern    | Low concern    | Low concern  | 96.1  | 100.0 | 96.9  | 2696.7 | 2805.0 | 5096.9 | 5096.9 | 1.9 | 2.0 |
| Montana       | 2016 | Low concern    | Low concern    | Low concern    | Low concern  | 79.9  | 90.8  | 105.9 | 2240.3 | 2805.0 | 4629.0 | 5096.9 | 2.1 | 2.0 |
| Nebraska      | 2016 | Low concern    | Low concern    | Low concern    | Low concern  | 81.4  | 89.1  | 102.0 | 2283.0 | 2805.0 | 4541.9 | 5096.9 | 2.0 | 2.0 |

|                |      |                |                |                |             |       |       |       |        |        |        |        |     |     |
|----------------|------|----------------|----------------|----------------|-------------|-------|-------|-------|--------|--------|--------|--------|-----|-----|
| Nevada         | 2016 | Low concern    | Low concern    | Low concern    | Low concern | 77.5  | 75.1  | 90.3  | 2173.6 | 2805.0 | 3826.9 | 5096.9 | 1.8 | 2.0 |
| New Hampshire  | 2016 | Low concern    | Low concern    | Low concern    | Low concern | 92.7  | 98.8  | 99.3  | 2599.4 | 2805.0 | 5035.5 | 5096.9 | 1.9 | 2.0 |
| New Jersey     | 2016 | High concern   | High concern   | Low concern    | Low concern | 246.0 | 135.4 | 51.3  | 6901.4 | 2805.0 | 6903.8 | 5096.9 | 1.0 | 2.0 |
| New Mexico     | 2016 | Low concern    | Low concern    | Low concern    | Low concern | 81.4  | 103.9 | 119.0 | 2282.2 | 2805.0 | 5297.6 | 5096.9 | 2.3 | 2.0 |
| New York       | 2016 | Low concern    | Low concern    | Low concern    | Low concern | 108.4 | 136.3 | 117.1 | 3039.8 | 2805.0 | 6946.5 | 5096.9 | 2.3 | 2.0 |
| North Carolina | 2016 | Low concern    | Low concern    | Low concern    | Low concern | 78.8  | 103.5 | 122.4 | 2210.9 | 2805.0 | 5277.4 | 5096.9 | 2.4 | 2.0 |
| North Dakota   | 2016 | Low concern    | Low concern    | Low concern    | Low concern | 97.8  | 98.6  | 93.9  | 2743.5 | 2805.0 | 5024.6 | 5096.9 | 1.8 | 2.0 |
| Ohio           | 2016 | Medium concern | Low concern    | Medium concern | Low concern | 121.6 | 151.3 | 115.9 | 3410.6 | 2805.0 | 7712.8 | 5096.9 | 2.3 | 2.0 |
| Oklahoma       | 2016 | Medium concern | Medium concern | Low concern    | Low concern | 72.5  | 80.8  | 103.8 | 2033.7 | 2805.0 | 4119.4 | 5096.9 | 2.0 | 2.0 |
| Oregon         | 2016 | Low concern    | Low concern    | Low concern    | Low concern | 91.6  | 97.6  | 99.2  | 2570.5 | 2805.0 | 4973.0 | 5096.9 | 1.9 | 2.0 |
| Pennsylvania   | 2016 | Low concern    | Low concern    | Low concern    | Low concern | 125.1 | 128.1 | 95.3  | 3509.7 | 2805.0 | 6527.8 | 5096.9 | 1.9 | 2.0 |
| Rhode Island   | 2016 | Low concern    | Low concern    | Low concern    | Low concern | 126.0 | 90.9  | 67.2  | 3533.4 | 2805.0 | 4630.6 | 5096.9 | 1.3 | 2.0 |
| South Carolina | 2016 | Low concern    | Low concern    | Low concern    | Low concern | 94.4  | 105.0 | 103.5 | 2649.2 | 2805.0 | 5349.8 | 5096.9 | 2.0 | 2.0 |
| South Dakota   | 2016 | Low concern    | Low concern    | Low concern    | Low concern | 119.2 | 89.5  | 69.9  | 3344.9 | 2805.0 | 4561.1 | 5096.9 | 1.4 | 2.0 |
| Tennessee      | 2016 | Low concern    | Low concern    | Low concern    | Low concern | 81.9  | 87.5  | 99.5  | 2296.2 | 2805.0 | 4457.7 | 5096.9 | 1.9 | 2.0 |
| Texas          | 2016 | Low concern    | Low concern    | Low concern    | Low concern | 104.3 | 132.4 | 118.3 | 2924.7 | 2805.0 | 6747.1 | 5096.9 | 2.3 | 2.0 |
| Utah           | 2016 | Medium concern | Medium concern | Medium concern | Low concern | 51.5  | 62.1  | 112.4 | 1444.2 | 2805.0 | 3166.3 | 5096.9 | 2.2 | 2.0 |
| Vermont        | 2016 | Low concern    | Low concern    | Low concern    | Low concern | 106.8 | 93.6  | 81.6  | 2996.0 | 2805.0 | 4771.6 | 5096.9 | 1.6 | 2.0 |

|                      |      |                |                |                |             |       |       |       |        |        |        |        |     |     |
|----------------------|------|----------------|----------------|----------------|-------------|-------|-------|-------|--------|--------|--------|--------|-----|-----|
| Virginia             | 2016 | Low concern    | Low concern    | Low concern    | Low concern | 128.1 | 90.6  | 65.9  | 3593.9 | 2805.0 | 4619.6 | 5096.9 | 1.3 | 2.0 |
| Washington           | 2016 | Low concern    | Low concern    | Low concern    | Low concern | 101.6 | 111.9 | 102.6 | 2850.1 | 2805.0 | 5703.7 | 5096.9 | 2.0 | 2.0 |
| West Virginia        | 2016 | Low concern    | Low concern    | Low concern    | Low concern | 106.8 | 136.4 | 119.0 | 2994.6 | 2805.0 | 6952.9 | 5096.9 | 2.3 | 2.0 |
| Wisconsin            | 2016 | Low concern    | Low concern    | Low concern    | Low concern | 100.0 | 102.6 | 95.6  | 2805.0 | 2805.0 | 5230.1 | 5096.9 | 1.9 | 2.0 |
| Wyoming              | 2016 | Medium concern | Medium concern | Low concern    | Low concern | 66.6  | 78.2  | 109.4 | 1867.3 | 2805.0 | 3985.9 | 5096.9 | 2.1 | 2.0 |
| Alabama              | 2017 | Medium concern | Medium concern | Medium concern | Low concern | 51.2  | 59.1  | 111.4 | 1454.6 | 2841.1 | 3229.9 | 5466.8 | 2.2 | 2.0 |
| Alaska               | 2017 | Low concern    | Low concern    | Low concern    | Low concern | 97.3  | 99.3  | 98.5  | 2765.6 | 2841.1 | 5428.4 | 5466.8 | 2.0 | 2.0 |
| Arizona              | 2017 | Low concern    | Low concern    | Low concern    | Low concern | 125.7 | 99.5  | 76.5  | 3570.7 | 2841.1 | 5441.3 | 5466.8 | 1.5 | 2.0 |
| Arkansas             | 2017 | High concern   | High concern   | Medium concern | Low concern | 48.2  | 50.0  | 100.2 | 1370.1 | 2841.1 | 2734.2 | 5466.8 | 2.0 | 2.0 |
| California           | 2017 | Low concern    | Low concern    | Low concern    | Low concern | 130.2 | 125.7 | 93.2  | 3698.9 | 2841.1 | 6870.6 | 5466.8 | 1.9 | 2.0 |
| Colorado             | 2017 | Medium concern | Medium concern | Low concern    | Low concern | 73.4  | 77.2  | 101.5 | 2086.7 | 2841.1 | 4219.1 | 5466.8 | 2.0 | 2.0 |
| Connecticut          | 2017 | Low concern    | Low concern    | Low concern    | Low concern | 105.5 | 127.0 | 116.2 | 2998.7 | 2841.1 | 6944.5 | 5466.8 | 2.3 | 2.0 |
| Delaware             | 2017 | Low concern    | Low concern    | Low concern    | Low concern | 130.5 | 129.5 | 95.8  | 3707.4 | 2841.1 | 7077.8 | 5466.8 | 1.9 | 2.0 |
| District of Columbia | 2017 | Low concern    | Low concern    | Low concern    | Low concern | 97.2  | 112.4 | 111.8 | 2760.3 | 2841.1 | 6145.9 | 5466.8 | 2.2 | 2.0 |
| Florida              | 2017 | High concern   | High concern   | High concern   | Low concern | 23.3  | 25.5  | 105.8 | 661.1  | 2841.1 | 1393.9 | 5466.8 | 2.1 | 2.0 |
| Georgia              | 2017 | Medium concern | Medium concern | Medium concern | Low concern | 67.9  | 64.8  | 92.2  | 1929.2 | 2841.1 | 3543.3 | 5466.8 | 1.8 | 2.0 |
| Hawaii               | 2017 | Low concern    | Low concern    | Low concern    | Low concern | 77.4  | 83.2  | 103.8 | 2198.9 | 2841.1 | 4549.1 | 5466.8 | 2.1 | 2.0 |
| Idaho                | 2017 | Low concern    | Low concern    | Low concern    | Low concern | 79.6  | 84.3  | 102.3 | 2260.8 | 2841.1 | 4609.7 | 5466.8 | 2.0 | 2.0 |



|               |      |                |                |                |             |       |       |       |        |        |        |        |     |     |
|---------------|------|----------------|----------------|----------------|-------------|-------|-------|-------|--------|--------|--------|--------|-----|-----|
| Illinois      | 2017 | Low concern    | Low concern    | Low concern    | Low concern | 125.1 | 106.3 | 82.1  | 3554.1 | 2841.1 | 5813.7 | 5466.8 | 1.6 | 2.0 |
| Indiana       | 2017 | Low concern    | Low concern    | Low concern    | Low concern | 96.9  | 102.1 | 101.8 | 2751.9 | 2841.1 | 5582.3 | 5466.8 | 2.0 | 2.0 |
| Iowa          | 2017 | Low concern    | Low concern    | Low concern    | Low concern | 92.5  | 78.1  | 81.5  | 2628.8 | 2841.1 | 4268.1 | 5466.8 | 1.6 | 2.0 |
| Kansas        | 2017 | Low concern    | Low concern    | Low concern    | Low concern | 80.5  | 83.2  | 99.8  | 2286.0 | 2841.1 | 4547.2 | 5466.8 | 2.0 | 2.0 |
| Kentucky      | 2017 | Low concern    | Low concern    | Low concern    | Low concern | 100.6 | 103.3 | 99.2  | 2857.2 | 2841.1 | 5646.8 | 5466.8 | 2.0 | 2.0 |
| Louisiana     | 2017 | High concern   | High concern   | Low concern    | Low concern | 220.0 | 114.9 | 50.5  | 6251.8 | 2841.1 | 6284.0 | 5466.8 | 1.0 | 2.0 |
| Maine         | 2017 | Medium concern | Low concern    | Medium concern | Low concern | 148.2 | 156.3 | 101.8 | 4211.5 | 2841.1 | 8542.6 | 5466.8 | 2.0 | 2.0 |
| Maryland      | 2017 | High concern   | High concern   | Low concern    | Low concern | 230.0 | 142.8 | 60.0  | 6535.0 | 2841.1 | 7808.1 | 5466.8 | 1.2 | 2.0 |
| Massachusetts | 2017 | High concern   | High concern   | Low concern    | Low concern | 213.3 | 136.6 | 61.8  | 6061.1 | 2841.1 | 7466.6 | 5466.8 | 1.2 | 2.0 |
| Michigan      | 2017 | Low concern    | Low concern    | Low concern    | Low concern | 100.2 | 118.9 | 114.6 | 2845.9 | 2841.1 | 6499.9 | 5466.8 | 2.3 | 2.0 |
| Minnesota     | 2017 | Low concern    | Low concern    | Low concern    | Low concern | 114.0 | 125.1 | 106.0 | 3240.1 | 2841.1 | 6839.6 | 5466.8 | 2.1 | 2.0 |
| Mississippi   | 2017 | Low concern    | Low concern    | Low concern    | Low concern | 82.3  | 99.8  | 117.1 | 2337.9 | 2841.1 | 5456.6 | 5466.8 | 2.3 | 2.0 |
| Missouri      | 2017 | Low concern    | Low concern    | Low concern    | Low concern | 104.4 | 102.8 | 95.0  | 2967.0 | 2841.1 | 5618.6 | 5466.8 | 1.9 | 2.0 |
| Montana       | 2017 | Low concern    | Low concern    | Low concern    | Low concern | 85.7  | 88.8  | 100.0 | 2435.8 | 2841.1 | 4853.0 | 5466.8 | 2.0 | 2.0 |
| Nebraska      | 2017 | Low concern    | Low concern    | Low concern    | Low concern | 85.2  | 91.5  | 103.7 | 2420.5 | 2841.1 | 5002.4 | 5466.8 | 2.1 | 2.0 |
| Nevada        | 2017 | Medium concern | Medium concern | Medium concern | Low concern | 73.4  | 71.9  | 94.5  | 2086.3 | 2841.1 | 3929.8 | 5466.8 | 1.9 | 2.0 |
| New Hampshire | 2017 | Low concern    | Low concern    | Low concern    | Low concern | 91.3  | 94.5  | 100.0 | 2594.0 | 2841.1 | 5166.5 | 5466.8 | 2.0 | 2.0 |
| New Jersey    | 2017 | High concern   | High concern   | Low concern    | Low concern | 259.3 | 134.8 | 50.2  | 7366.7 | 2841.1 | 7369.1 | 5466.8 | 1.0 | 2.0 |

|                |      |                |                |                |             |       |       |       |        |        |        |        |     |     |
|----------------|------|----------------|----------------|----------------|-------------|-------|-------|-------|--------|--------|--------|--------|-----|-----|
| New Mexico     | 2017 | Low concern    | Low concern    | Low concern    | Low concern | 81.9  | 100.5 | 118.5 | 2326.9 | 2841.1 | 5493.8 | 5466.8 | 2.4 | 2.0 |
| New York       | 2017 | Low concern    | Low concern    | Low concern    | Low concern | 109.2 | 121.0 | 107.0 | 3102.1 | 2841.1 | 6615.4 | 5466.8 | 2.1 | 2.0 |
| North Carolina | 2017 | Low concern    | Low concern    | Low concern    | Low concern | 81.6  | 96.4  | 114.1 | 2318.4 | 2841.1 | 5271.3 | 5466.8 | 2.3 | 2.0 |
| North Dakota   | 2017 | Low concern    | Low concern    | Low concern    | Low concern | 105.1 | 102.5 | 94.1  | 2987.4 | 2841.1 | 5601.2 | 5466.8 | 1.9 | 2.0 |
| Ohio           | 2017 | Medium concern | Low concern    | Medium concern | Low concern | 127.3 | 152.9 | 116.0 | 3616.3 | 2841.1 | 8356.0 | 5466.8 | 2.3 | 2.0 |
| Oklahoma       | 2017 | Medium concern | Medium concern | Low concern    | Low concern | 74.6  | 78.5  | 101.6 | 2119.5 | 2841.1 | 4291.9 | 5466.8 | 2.0 | 2.0 |
| Oregon         | 2017 | Low concern    | Low concern    | Low concern    | Low concern | 97.5  | 97.0  | 96.1  | 2770.6 | 2841.1 | 5303.8 | 5466.8 | 1.9 | 2.0 |
| Pennsylvania   | 2017 | Low concern    | Low concern    | Low concern    | Low concern | 124.0 | 115.5 | 90.0  | 3522.6 | 2841.1 | 6316.4 | 5466.8 | 1.8 | 2.0 |
| Rhode Island   | 2017 | Low concern    | Low concern    | Low concern    | Low concern | 133.2 | 84.8  | 61.5  | 3783.4 | 2841.1 | 4633.8 | 5466.8 | 1.2 | 2.0 |
| South Carolina | 2017 | Low concern    | Low concern    | Low concern    | Low concern | 95.6  | 100.0 | 101.1 | 2715.0 | 2841.1 | 5466.8 | 5466.8 | 2.0 | 2.0 |
| South Dakota   | 2017 | Low concern    | Low concern    | Low concern    | Low concern | 120.7 | 85.4  | 68.4  | 3428.6 | 2841.1 | 4670.1 | 5466.8 | 1.4 | 2.0 |
| Tennessee      | 2017 | Low concern    | Low concern    | Low concern    | Low concern | 82.8  | 85.3  | 99.5  | 2351.3 | 2841.1 | 4663.5 | 5466.8 | 2.0 | 2.0 |
| Texas          | 2017 | Low concern    | Low concern    | Low concern    | Low concern | 106.6 | 128.1 | 116.1 | 3027.4 | 2841.1 | 7001.0 | 5466.8 | 2.3 | 2.0 |
| Utah           | 2017 | Low concern    | Low concern    | Low concern    | Low concern | 78.5  | 82.3  | 101.2 | 2230.7 | 2841.1 | 4496.8 | 5466.8 | 2.0 | 2.0 |
| Vermont        | 2017 | Medium concern | Medium concern | Low concern    | Low concern | 151.6 | 111.5 | 71.0  | 4306.5 | 2841.1 | 6094.4 | 5466.8 | 1.4 | 2.0 |
| Virginia       | 2017 | Low concern    | Low concern    | Low concern    | Low concern | 142.1 | 94.2  | 64.0  | 4038.3 | 2841.1 | 5151.8 | 5466.8 | 1.3 | 2.0 |
| Washington     | 2017 | Low concern    | Low concern    | Low concern    | Low concern | 100.0 | 106.0 | 102.4 | 2841.9 | 2841.1 | 5796.3 | 5466.8 | 2.0 | 2.0 |
| West Virginia  | 2017 | Low concern    | Low concern    | Low concern    | Low concern | 100.0 | 119.1 | 115.0 | 2841.1 | 2841.1 | 6508.5 | 5466.8 | 2.3 | 2.0 |

|                      |      |                |                |                |             |       |       |       |        |        |        |        |     |     |
|----------------------|------|----------------|----------------|----------------|-------------|-------|-------|-------|--------|--------|--------|--------|-----|-----|
| Wisconsin            | 2017 | Low concern    | Low concern    | Low concern    | Low concern | 109.8 | 104.1 | 91.6  | 3118.4 | 2841.1 | 5692.7 | 5466.8 | 1.8 | 2.0 |
| Wyoming              | 2017 | Low concern    | Low concern    | Low concern    | Low concern | 84.3  | 95.2  | 109.0 | 2395.8 | 2841.1 | 5202.4 | 5466.8 | 2.2 | 2.0 |
| Alabama              | 2018 | Medium concern | Medium concern | Medium concern | Low concern | 54.5  | 56.4  | 100.0 | 1596.9 | 2932.8 | 3213.0 | 5695.0 | 2.0 | 2.0 |
| Alaska               | 2018 | Low concern    | Low concern    | Low concern    | Low concern | 105.1 | 107.7 | 98.9  | 3082.6 | 2932.8 | 6133.2 | 5695.0 | 2.0 | 2.0 |
| Arizona              | 2018 | Low concern    | Low concern    | Low concern    | Low concern | 120.6 | 95.4  | 76.4  | 3537.4 | 2932.8 | 5435.1 | 5695.0 | 1.5 | 2.0 |
| Arkansas             | 2018 | Medium concern | Medium concern | Medium concern | Low concern | 56.1  | 57.7  | 99.3  | 1643.9 | 2932.8 | 3284.4 | 5695.0 | 2.0 | 2.0 |
| California           | 2018 | Low concern    | Low concern    | Low concern    | Low concern | 128.3 | 124.7 | 93.9  | 3762.2 | 2932.8 | 7104.3 | 5695.0 | 1.9 | 2.0 |
| Colorado             | 2018 | Low concern    | Low concern    | Low concern    | Low concern | 75.6  | 81.2  | 103.6 | 2217.7 | 2932.8 | 4624.5 | 5695.0 | 2.1 | 2.0 |
| Connecticut          | 2018 | Low concern    | Low concern    | Low concern    | Low concern | 104.7 | 130.3 | 120.2 | 3070.4 | 2932.8 | 7423.3 | 5695.0 | 2.4 | 2.0 |
| Delaware             | 2018 | Low concern    | Low concern    | Low concern    | Low concern | 132.9 | 130.4 | 94.7  | 3897.5 | 2932.8 | 7426.2 | 5695.0 | 1.9 | 2.0 |
| District of Columbia | 2018 | Low concern    | Low concern    | Low concern    | Low concern | 104.0 | 116.8 | 108.4 | 3049.7 | 2932.8 | 6650.3 | 5695.0 | 2.2 | 2.0 |
| Florida              | 2018 | Unusable       | Unusable       | Unusable       | Low concern | 5.7   | 7.6   | 127.6 | 168.5  | 2932.8 | 432.5  | 5695.0 | 2.6 | 2.0 |
| Georgia              | 2018 | Medium concern | Medium concern | Medium concern | Low concern | 63.7  | 61.9  | 93.9  | 1867.3 | 2932.8 | 3526.2 | 5695.0 | 1.9 | 2.0 |
| Hawaii               | 2018 | Low concern    | Low concern    | Low concern    | Low concern | 75.0  | 82.4  | 106.0 | 2199.8 | 2932.8 | 4690.5 | 5695.0 | 2.1 | 2.0 |
| Idaho                | 2018 | Low concern    | Low concern    | Low concern    | Low concern | 79.2  | 84.1  | 102.5 | 2324.0 | 2932.8 | 4790.8 | 5695.0 | 2.1 | 2.0 |
| Illinois             | 2018 | Low concern    | Low concern    | Low concern    | Low concern | 113.6 | 100.0 | 84.9  | 3332.5 | 2932.8 | 5695.0 | 5695.0 | 1.7 | 2.0 |
| Indiana              | 2018 | Low concern    | Low concern    | Low concern    | Low concern | 93.8  | 99.2  | 102.0 | 2752.0 | 2932.8 | 5649.0 | 5695.0 | 2.1 | 2.0 |
| Iowa                 | 2018 | Low concern    | Low concern    | Low concern    | Low concern | 92.4  | 80.5  | 84.1  | 2708.5 | 2932.8 | 4583.1 | 5695.0 | 1.7 | 2.0 |

|                |      |                |                |                |              |       |       |       |        |        |        |        |     |     |
|----------------|------|----------------|----------------|----------------|--------------|-------|-------|-------|--------|--------|--------|--------|-----|-----|
| Kansas         | 2018 | Low concern    | Low concern    | Low concern    | Low concern  | 81.2  | 84.2  | 100.0 | 2381.6 | 2932.8 | 4793.6 | 5695.0 | 2.0 | 2.0 |
| Kentucky       | 2018 | Low concern    | Low concern    | Low concern    | Low concern  | 100.0 | 104.0 | 100.4 | 2932.8 | 2932.8 | 5925.5 | 5695.0 | 2.0 | 2.0 |
| Louisiana      | 2018 | High concern   | High concern   | Low concern    | High concern | 229.2 | 118.5 | 49.9  | 6720.9 | 2932.8 | 6750.8 | 5695.0 | 1.0 | 2.0 |
| Maine          | 2018 | Low concern    | Low concern    | Low concern    | Low concern  | 139.1 | 146.9 | 101.9 | 4080.6 | 2932.8 | 8365.1 | 5695.0 | 2.0 | 2.0 |
| Maryland       | 2018 | High concern   | High concern   | Low concern    | Low concern  | 224.2 | 136.4 | 58.7  | 6573.9 | 2932.8 | 7765.2 | 5695.0 | 1.2 | 2.0 |
| Massachusetts  | 2018 | Medium concern | Medium concern | Low concern    | Low concern  | 196.5 | 129.7 | 63.7  | 5762.9 | 2932.8 | 7387.2 | 5695.0 | 1.3 | 2.0 |
| Michigan       | 2018 | Low concern    | Low concern    | Low concern    | Low concern  | 96.5  | 115.4 | 115.3 | 2831.3 | 2932.8 | 6570.2 | 5695.0 | 2.3 | 2.0 |
| Minnesota      | 2018 | Low concern    | Low concern    | Low concern    | Low concern  | 113.4 | 126.6 | 107.7 | 3327.0 | 2932.8 | 7208.8 | 5695.0 | 2.2 | 2.0 |
| Mississippi    | 2018 | Low concern    | Low concern    | Low concern    | Low concern  | 80.7  | 97.6  | 116.8 | 2365.9 | 2932.8 | 5559.4 | 5695.0 | 2.3 | 2.0 |
| Missouri       | 2018 | Low concern    | Low concern    | Low concern    | Low concern  | 108.4 | 105.8 | 94.2  | 3178.0 | 2932.8 | 6024.2 | 5695.0 | 1.9 | 2.0 |
| Montana        | 2018 | Low concern    | Low concern    | Low concern    | Low concern  | 89.0  | 88.9  | 96.3  | 2611.3 | 2932.8 | 5060.3 | 5695.0 | 1.9 | 2.0 |
| Nebraska       | 2018 | Low concern    | Low concern    | Low concern    | Low concern  | 80.9  | 84.7  | 101.1 | 2372.3 | 2932.8 | 4825.4 | 5695.0 | 2.0 | 2.0 |
| Nevada         | 2018 | Medium concern | Medium concern | Medium concern | Low concern  | 70.2  | 70.9  | 97.5  | 2058.2 | 2932.8 | 4036.1 | 5695.0 | 2.0 | 2.0 |
| New Hampshire  | 2018 | Low concern    | Low concern    | Low concern    | Low concern  | 82.4  | 89.6  | 104.9 | 2416.1 | 2932.8 | 5101.7 | 5695.0 | 2.1 | 2.0 |
| New Jersey     | 2018 | High concern   | High concern   | Low concern    | High concern | 248.6 | 128.1 | 49.7  | 7290.6 | 2932.8 | 7293.2 | 5695.0 | 1.0 | 2.0 |
| New Mexico     | 2018 | Low concern    | Low concern    | Low concern    | Low concern  | 82.5  | 102.5 | 119.9 | 2419.0 | 2932.8 | 5836.2 | 5695.0 | 2.4 | 2.0 |
| New York       | 2018 | Low concern    | Low concern    | Low concern    | Low concern  | 110.0 | 120.7 | 105.9 | 3226.8 | 2932.8 | 6874.5 | 5695.0 | 2.1 | 2.0 |
| North Carolina | 2018 | Low concern    | Low concern    | Low concern    | Low concern  | 79.4  | 92.9  | 112.9 | 2329.1 | 2932.8 | 5292.9 | 5695.0 | 2.3 | 2.0 |

|                |      |                |                |                |             |       |       |       |        |        |        |        |     |     |
|----------------|------|----------------|----------------|----------------|-------------|-------|-------|-------|--------|--------|--------|--------|-----|-----|
| North Dakota   | 2018 | Low concern    | Low concern    | Low concern    | Low concern | 105.7 | 105.5 | 96.3  | 3101.3 | 2932.8 | 6010.3 | 5695.0 | 1.9 | 2.0 |
| Ohio           | 2018 | Medium concern | Low concern    | Medium concern | Low concern | 129.3 | 159.4 | 119.0 | 3792.7 | 2932.8 | 9079.0 | 5695.0 | 2.4 | 2.0 |
| Oklahoma       | 2018 | Medium concern | Medium concern | Medium concern | Low concern | 71.8  | 74.9  | 100.7 | 2105.0 | 2932.8 | 4265.4 | 5695.0 | 2.0 | 2.0 |
| Oregon         | 2018 | Low concern    | Low concern    | Low concern    | Low concern | 111.0 | 103.0 | 89.5  | 3255.7 | 2932.8 | 5865.0 | 5695.0 | 1.8 | 2.0 |
| Pennsylvania   | 2018 | Low concern    | Low concern    | Low concern    | Low concern | 122.0 | 118.1 | 93.5  | 3577.5 | 2932.8 | 6728.4 | 5695.0 | 1.9 | 2.0 |
| Rhode Island   | 2018 | High concern   | High concern   | Low concern    | Low concern | 227.0 | 124.6 | 53.0  | 6657.7 | 2932.8 | 7095.0 | 5695.0 | 1.1 | 2.0 |
| South Carolina | 2018 | Low concern    | Low concern    | Low concern    | Low concern | 92.8  | 95.8  | 99.6  | 2720.5 | 2932.8 | 5453.4 | 5695.0 | 2.0 | 2.0 |
| South Dakota   | 2018 | Low concern    | Low concern    | Low concern    | Low concern | 117.1 | 81.7  | 67.3  | 3434.5 | 2932.8 | 4650.0 | 5695.0 | 1.4 | 2.0 |
| Tennessee      | 2018 | Low concern    | Low concern    | Low concern    | Low concern | 83.2  | 84.7  | 98.3  | 2439.1 | 2932.8 | 4824.7 | 5695.0 | 2.0 | 2.0 |
| Texas          | 2018 | Low concern    | Low concern    | Low concern    | Low concern | 106.2 | 128.0 | 116.4 | 3114.0 | 2932.8 | 7292.3 | 5695.0 | 2.3 | 2.0 |
| Utah           | 2018 | Medium concern | Medium concern | Low concern    | Low concern | 73.1  | 77.3  | 102.0 | 2144.6 | 2932.8 | 4402.4 | 5695.0 | 2.1 | 2.0 |
| Vermont        | 2018 | Low concern    | Low concern    | Low concern    | Low concern | 143.9 | 105.2 | 70.6  | 4220.7 | 2932.8 | 5992.1 | 5695.0 | 1.4 | 2.0 |
| Virginia       | 2018 | Low concern    | Low concern    | Low concern    | Low concern | 132.0 | 88.0  | 64.3  | 3872.4 | 2932.8 | 5013.5 | 5695.0 | 1.3 | 2.0 |
| Washington     | 2018 | Low concern    | Low concern    | Low concern    | Low concern | 98.7  | 102.6 | 100.3 | 2895.0 | 2932.8 | 5844.3 | 5695.0 | 2.0 | 2.0 |
| West Virginia  | 2018 | Low concern    | Low concern    | Low concern    | Low concern | 80.8  | 92.9  | 111.0 | 2369.9 | 2932.8 | 5291.7 | 5695.0 | 2.2 | 2.0 |
| Wisconsin      | 2018 | Low concern    | Low concern    | Low concern    | Low concern | 111.4 | 105.1 | 91.1  | 3267.5 | 2932.8 | 5986.6 | 5695.0 | 1.8 | 2.0 |
| Wyoming        | 2018 | Low concern    | Low concern    | Low concern    | Low concern | 83.1  | 93.9  | 109.1 | 2436.3 | 2932.8 | 5348.3 | 5695.0 | 2.2 | 2.0 |
| Alabama        | 2019 | High concern   | High concern   | High concern   | Low concern | 44.9  | 46.8  | 99.2  | 1391.0 | 3095.5 | 2777.4 | 5937.9 | 2.0 | 2.0 |

|                      |      |                |                |                |              |       |       |       |        |        |        |        |     |     |
|----------------------|------|----------------|----------------|----------------|--------------|-------|-------|-------|--------|--------|--------|--------|-----|-----|
| Alaska               | 2019 | Low concern    | Low concern    | Low concern    | Low concern  | 98.9  | 101.2 | 97.5  | 3062.2 | 3095.5 | 6011.2 | 5937.9 | 2.0 | 2.0 |
| Arizona              | 2019 | Low concern    | Low concern    | Low concern    | Low concern  | 115.2 | 93.1  | 77.0  | 3564.8 | 3095.5 | 5525.3 | 5937.9 | 1.5 | 2.0 |
| Arkansas             | 2019 | Medium concern | Medium concern | Medium concern | Low concern  | 58.0  | 60.9  | 100.0 | 1796.2 | 3095.5 | 3615.3 | 5937.9 | 2.0 | 2.0 |
| California           | 2019 | Low concern    | Low concern    | Low concern    | Low concern  | 121.0 | 125.2 | 98.6  | 3744.1 | 3095.5 | 7433.7 | 5937.9 | 2.0 | 2.0 |
| Colorado             | 2019 | Low concern    | Low concern    | Low concern    | Low concern  | 76.1  | 84.0  | 105.2 | 2354.4 | 3095.5 | 4986.5 | 5937.9 | 2.1 | 2.0 |
| Connecticut          | 2019 | Low concern    | Low concern    | Low concern    | Low concern  | 102.0 | 130.3 | 121.7 | 3158.9 | 3095.5 | 7738.3 | 5937.9 | 2.4 | 2.0 |
| Delaware             | 2019 | Low concern    | Low concern    | Low concern    | Low concern  | 134.9 | 139.2 | 98.3  | 4176.9 | 3095.5 | 8268.2 | 5937.9 | 2.0 | 2.0 |
| District of Columbia | 2019 | Low concern    | Low concern    | Low concern    | Low concern  | 107.4 | 119.2 | 105.8 | 3323.7 | 3095.5 | 7079.7 | 5937.9 | 2.1 | 2.0 |
| Florida              | 2019 | Low concern    | Low concern    | Low concern    | Low concern  | 78.2  | 75.4  | 91.9  | 2420.4 | 3095.5 | 4476.1 | 5937.9 | 1.8 | 2.0 |
| Georgia              | 2019 | Medium concern | Medium concern | Low concern    | Low concern  | 69.8  | 77.4  | 105.8 | 2159.4 | 3095.5 | 4597.5 | 5937.9 | 2.1 | 2.0 |
| Hawaii               | 2019 | Medium concern | Medium concern | Low concern    | Low concern  | 69.9  | 77.2  | 105.3 | 2162.7 | 3095.5 | 4583.8 | 5937.9 | 2.1 | 2.0 |
| Idaho                | 2019 | Low concern    | Low concern    | Low concern    | Low concern  | 76.8  | 83.5  | 103.6 | 2378.0 | 3095.5 | 4957.4 | 5937.9 | 2.1 | 2.0 |
| Illinois             | 2019 | Low concern    | Low concern    | Low concern    | Low concern  | 115.5 | 102.9 | 85.0  | 3573.9 | 3095.5 | 6112.8 | 5937.9 | 1.7 | 2.0 |
| Indiana              | 2019 | Medium concern | Medium concern | Low concern    | Low concern  | 72.5  | 77.8  | 102.2 | 2244.5 | 3095.5 | 4617.1 | 5937.9 | 2.1 | 2.0 |
| Iowa                 | 2019 | Low concern    | Low concern    | Low concern    | Low concern  | 88.5  | 81.6  | 87.8  | 2740.9 | 3095.5 | 4846.5 | 5937.9 | 1.8 | 2.0 |
| Kansas               | 2019 | Low concern    | Low concern    | Low concern    | Low concern  | 110.2 | 110.9 | 95.9  | 3410.7 | 3095.5 | 6582.7 | 5937.9 | 1.9 | 2.0 |
| Kentucky             | 2019 | Low concern    | Low concern    | Low concern    | Low concern  | 101.6 | 107.5 | 100.8 | 3146.5 | 3095.5 | 6383.3 | 5937.9 | 2.0 | 2.0 |
| Louisiana            | 2019 | High concern   | High concern   | Low concern    | High concern | 222.4 | 116.4 | 49.9  | 6885.0 | 3095.5 | 6914.4 | 5937.9 | 1.0 | 2.0 |

|                |      |                |                |                |              |       |       |       |        |        |        |        |     |     |
|----------------|------|----------------|----------------|----------------|--------------|-------|-------|-------|--------|--------|--------|--------|-----|-----|
| Maine          | 2019 | Low concern    | Low concern    | Low concern    | Low concern  | 122.0 | 134.5 | 105.0 | 3776.7 | 3095.5 | 7984.0 | 5937.9 | 2.1 | 2.0 |
| Maryland       | 2019 | High concern   | High concern   | Low concern    | Low concern  | 213.3 | 131.9 | 58.9  | 6603.3 | 3095.5 | 7832.5 | 5937.9 | 1.2 | 2.0 |
| Massachusetts  | 2019 | Medium concern | Medium concern | Low concern    | Low concern  | 190.9 | 129.7 | 64.7  | 5910.1 | 3095.5 | 7699.6 | 5937.9 | 1.3 | 2.0 |
| Michigan       | 2019 | Low concern    | Low concern    | Low concern    | Low concern  | 89.1  | 106.4 | 113.8 | 2757.2 | 3095.5 | 6315.2 | 5937.9 | 2.3 | 2.0 |
| Minnesota      | 2019 | Low concern    | Low concern    | Low concern    | Low concern  | 111.6 | 126.4 | 108.0 | 3453.9 | 3095.5 | 7505.3 | 5937.9 | 2.2 | 2.0 |
| Mississippi    | 2019 | Low concern    | Low concern    | Low concern    | Low concern  | 76.7  | 94.0  | 116.8 | 2375.0 | 3095.5 | 5582.5 | 5937.9 | 2.4 | 2.0 |
| Missouri       | 2019 | Low concern    | Low concern    | Low concern    | Low concern  | 108.1 | 106.3 | 93.7  | 3346.7 | 3095.5 | 6312.8 | 5937.9 | 1.9 | 2.0 |
| Montana        | 2019 | Low concern    | Low concern    | Low concern    | Low concern  | 84.5  | 86.6  | 97.6  | 2616.9 | 3095.5 | 5143.1 | 5937.9 | 2.0 | 2.0 |
| Nebraska       | 2019 | Low concern    | Low concern    | Low concern    | Low concern  | 77.3  | 81.3  | 100.3 | 2392.7 | 3095.5 | 4830.4 | 5937.9 | 2.0 | 2.0 |
| Nevada         | 2019 | Medium concern | Medium concern | Medium concern | Low concern  | 65.5  | 72.8  | 105.9 | 2027.7 | 3095.5 | 4323.7 | 5937.9 | 2.1 | 2.0 |
| New Hampshire  | 2019 | Low concern    | Low concern    | Low concern    | Low concern  | 85.4  | 94.0  | 104.9 | 2643.6 | 3095.5 | 5584.0 | 5937.9 | 2.1 | 2.0 |
| New Jersey     | 2019 | High concern   | High concern   | Low concern    | High concern | 248.5 | 129.6 | 49.7  | 7693.0 | 3095.5 | 7694.8 | 5937.9 | 1.0 | 2.0 |
| New Mexico     | 2019 | Low concern    | Low concern    | Low concern    | Low concern  | 81.8  | 102.0 | 118.9 | 2532.2 | 3095.5 | 6057.9 | 5937.9 | 2.4 | 2.0 |
| New York       | 2019 | Low concern    | Low concern    | Low concern    | Low concern  | 106.2 | 122.6 | 110.0 | 3288.8 | 3095.5 | 7279.4 | 5937.9 | 2.2 | 2.0 |
| North Carolina | 2019 | Low concern    | Low concern    | Low concern    | Low concern  | 76.9  | 91.7  | 113.7 | 2379.1 | 3095.5 | 5446.4 | 5937.9 | 2.3 | 2.0 |
| North Dakota   | 2019 | Low concern    | Low concern    | Low concern    | Low concern  | 100.0 | 101.0 | 96.2  | 3095.5 | 3095.5 | 5996.3 | 5937.9 | 1.9 | 2.0 |
| Ohio           | 2019 | Medium concern | Low concern    | Medium concern | Low concern  | 127.2 | 158.7 | 119.0 | 3936.2 | 3095.5 | 9425.2 | 5937.9 | 2.4 | 2.0 |
| Oklahoma       | 2019 | Medium concern | Medium concern | Medium concern | Low concern  | 66.4  | 72.4  | 103.9 | 2054.7 | 3095.5 | 4296.2 | 5937.9 | 2.1 | 2.0 |

|                |      |                |                |                |             |       |       |       |        |        |        |        |     |     |
|----------------|------|----------------|----------------|----------------|-------------|-------|-------|-------|--------|--------|--------|--------|-----|-----|
| Oregon         | 2019 | Low concern    | Low concern    | Low concern    | Low concern | 104.5 | 100.9 | 92.0  | 3235.8 | 3095.5 | 5994.1 | 5937.9 | 1.9 | 2.0 |
| Pennsylvania   | 2019 | Low concern    | Low concern    | Low concern    | Low concern | 117.1 | 112.4 | 91.5  | 3624.9 | 3095.5 | 6675.1 | 5937.9 | 1.8 | 2.0 |
| Rhode Island   | 2019 | Medium concern | Medium concern | Low concern    | Low concern | 191.4 | 138.2 | 68.8  | 5923.2 | 3095.5 | 8205.9 | 5937.9 | 1.4 | 2.0 |
| South Carolina | 2019 | Low concern    | Low concern    | Low concern    | Low concern | 93.0  | 95.7  | 98.1  | 2877.9 | 3095.5 | 5680.2 | 5937.9 | 2.0 | 2.0 |
| South Dakota   | 2019 | Low concern    | Low concern    | Low concern    | Low concern | 113.4 | 79.4  | 66.8  | 3508.9 | 3095.5 | 4717.0 | 5937.9 | 1.3 | 2.0 |
| Tennessee      | 2019 | Low concern    | Low concern    | Low concern    | Low concern | 79.2  | 81.8  | 98.4  | 2450.9 | 3095.5 | 4855.5 | 5937.9 | 2.0 | 2.0 |
| Texas          | 2019 | Low concern    | Low concern    | Low concern    | Low concern | 102.4 | 122.9 | 114.4 | 3168.6 | 3095.5 | 7299.0 | 5937.9 | 2.3 | 2.0 |
| Utah           | 2019 | Medium concern | Medium concern | Low concern    | Low concern | 68.9  | 76.0  | 105.1 | 2132.5 | 3095.5 | 4513.1 | 5937.9 | 2.1 | 2.0 |
| Vermont        | 2019 | Low concern    | Low concern    | Low concern    | Low concern | 146.9 | 105.5 | 68.4  | 4547.0 | 3095.5 | 6261.8 | 5937.9 | 1.4 | 2.0 |
| Virginia       | 2019 | Low concern    | Low concern    | Low concern    | Low concern | 106.2 | 80.3  | 72.1  | 3287.1 | 3095.5 | 4767.7 | 5937.9 | 1.5 | 2.0 |
| Washington     | 2019 | Low concern    | Low concern    | Low concern    | Low concern | 91.6  | 98.6  | 102.5 | 2836.3 | 3095.5 | 5852.7 | 5937.9 | 2.1 | 2.0 |
| West Virginia  | 2019 | Medium concern | Medium concern | Medium concern | Low concern | 61.6  | 71.2  | 110.1 | 1907.9 | 3095.5 | 4228.3 | 5937.9 | 2.2 | 2.0 |
| Wisconsin      | 2019 | Low concern    | Low concern    | Low concern    | Low concern | 101.5 | 100.0 | 93.9  | 3142.9 | 3095.5 | 5937.9 | 5937.9 | 1.9 | 2.0 |
| Wyoming        | 2019 | Low concern    | Low concern    | Low concern    | Low concern | 78.1  | 88.6  | 108.1 | 2417.7 | 3095.5 | 5258.8 | 5937.9 | 2.2 | 2.0 |



Supplement eTable 3. RX claims volume data quality assessment for eligible women ages 18 to 44 who gave birth in 2016-2019

| State                | Date | DQ Assessment  | Assessment of RX File Header Record Volume | Assessment of RX File Line Record Volume | Assessment of Avg RX Line Records per Header | RX File Header Records per 1,000 Enrolled Months as % of National Median | RX File Line Records per 1,000 Enrolled Months as % of National Median | Avg RX File Line Records per Header | RX File Header Records per 1,000 Enrolled Months | National Median: Header Records per 1,000 Enrolled Months in RX File | RX File Line Records per 1,000 Enrolled Months | National Median: Line Records per 1,000 Enrolled Months in RX File | Avg RX File Line Records per Header | National Median: Avg Line Records per Header in RX File |
|----------------------|------|----------------|--------------------------------------------|------------------------------------------|----------------------------------------------|--------------------------------------------------------------------------|------------------------------------------------------------------------|-------------------------------------|--------------------------------------------------|----------------------------------------------------------------------|------------------------------------------------|--------------------------------------------------------------------|-------------------------------------|---------------------------------------------------------|
| Alabama              | 2016 | Medium concern | Medium concern                             | Medium concern                           | Low concern                                  | 68.4                                                                     | 68.0                                                                   | 100.0                               | 583.6                                            | 853.3                                                                | 584.1                                          | 858.4                                                              | 1.0                                 | 1.0                                                     |
| Alaska               | 2016 | Medium concern | Medium concern                             | Medium concern                           | Low concern                                  | 68.4                                                                     | 68.1                                                                   | 100.1                               | 583.5                                            | 853.3                                                                | 584.8                                          | 858.4                                                              | 1.0                                 | 1.0                                                     |
| Arizona              | 2016 | Low concern    | Low concern                                | Low concern                              | Low concern                                  | 90.2                                                                     | 89.7                                                                   | 99.9                                | 770.1                                            | 853.3                                                                | 770.1                                          | 858.4                                                              | 1.0                                 | 1.0                                                     |
| Arkansas             | 2016 | High concern   | High concern                               | High concern                             | Low concern                                  | 25.0                                                                     | 24.9                                                                   | 100.0                               | 213.7                                            | 853.3                                                                | 214.0                                          | 858.4                                                              | 1.0                                 | 1.0                                                     |
| California           | 2016 | Low concern    | Low concern                                | Low concern                              | Low concern                                  | 94.7                                                                     | 94.2                                                                   | 99.9                                | 808.4                                            | 853.3                                                                | 808.4                                          | 858.4                                                              | 1.0                                 | 1.0                                                     |
| Colorado             | 2016 | Medium concern | Medium concern                             | Medium concern                           | Low concern                                  | 67.7                                                                     | 67.4                                                                   | 100.0                               | 577.8                                            | 853.3                                                                | 578.6                                          | 858.4                                                              | 1.0                                 | 1.0                                                     |
| Connecticut          | 2016 | Low concern    | Low concern                                | Low concern                              | Low concern                                  | 115.1                                                                    | 114.7                                                                  | 100.1                               | 982.6                                            | 853.3                                                                | 984.8                                          | 858.4                                                              | 1.0                                 | 1.0                                                     |
| Delaware             | 2016 | Low concern    | Low concern                                | Low concern                              | Low concern                                  | 103.3                                                                    | 102.9                                                                  | 100.1                               | 881.9                                            | 853.3                                                                | 883.3                                          | 858.4                                                              | 1.0                                 | 1.0                                                     |
| District of Columbia | 2016 | Low concern    | Low concern                                | Low concern                              | Low concern                                  | 100.9                                                                    | 100.4                                                                  | 100.0                               | 861.1                                            | 853.3                                                                | 861.7                                          | 858.4                                                              | 1.0                                 | 1.0                                                     |
| Florida              | 2016 | Medium concern | Medium concern                             | Medium concern                           | Low concern                                  | 73.4                                                                     | 73.0                                                                   | 99.9                                | 626.4                                            | 853.3                                                                | 626.4                                          | 858.4                                                              | 1.0                                 | 1.0                                                     |

|               |      |             |             |             |             |       |       |       |        |       |        |       |     |     |
|---------------|------|-------------|-------------|-------------|-------------|-------|-------|-------|--------|-------|--------|-------|-----|-----|
| Georgia       | 2016 | Low concern | Low concern | Low concern | Low concern | 112.1 | 111.4 | 99.9  | 956.5  | 853.3 | 956.5  | 858.4 | 1.0 | 1.0 |
| Hawaii        | 2016 | Low concern | Low concern | Low concern | Low concern | 76.7  | 76.3  | 99.9  | 654.8  | 853.3 | 654.8  | 858.4 | 1.0 | 1.0 |
| Idaho         | 2016 | Low concern | Low concern | Low concern | Low concern | 99.0  | 98.5  | 99.9  | 845.2  | 853.3 | 845.2  | 858.4 | 1.0 | 1.0 |
| Illinois      | 2016 | Low concern | Low concern | Low concern | Low concern | 93.5  | 93.7  | 100.6 | 798.1  | 853.3 | 804.0  | 858.4 | 1.0 | 1.0 |
| Indiana       | 2016 | Low concern | Low concern | Low concern | Low concern | 98.2  | 98.3  | 100.6 | 838.0  | 853.3 | 843.8  | 858.4 | 1.0 | 1.0 |
| Iowa          | 2016 | Low concern | Low concern | Low concern | Low concern | 96.9  | 96.3  | 99.9  | 826.6  | 853.3 | 826.5  | 858.4 | 1.0 | 1.0 |
| Kansas        | 2016 | Low concern | Low concern | Low concern | Low concern | 96.1  | 97.4  | 101.8 | 820.3  | 853.3 | 835.8  | 858.4 | 1.0 | 1.0 |
| Kentucky      | 2016 | Low concern | Low concern | Low concern | Low concern | 132.2 | 131.9 | 100.3 | 1128.2 | 853.3 | 1132.7 | 858.4 | 1.0 | 1.0 |
| Louisiana     | 2016 | Low concern | Low concern | Low concern | Low concern | 100.6 | 100.0 | 99.9  | 858.4  | 853.3 | 858.4  | 858.4 | 1.0 | 1.0 |
| Maine         | 2016 | Low concern | Low concern | Low concern | Low concern | 117.1 | 116.6 | 100.1 | 999.0  | 853.3 | 1001.2 | 858.4 | 1.0 | 1.0 |
| Maryland      | 2016 | Low concern | Low concern | Low concern | Low concern | 118.4 | 117.7 | 99.9  | 1010.3 | 853.3 | 1010.3 | 858.4 | 1.0 | 1.0 |
| Massachusetts | 2016 | Low concern | Low concern | Low concern | Low concern | 114.4 | 107.8 | 94.7  | 975.9  | 853.3 | 925.2  | 858.4 | 0.9 | 1.0 |
| Michigan      | 2016 | Low concern | Low concern | Low concern | Low concern | 118.8 | 118.1 | 99.9  | 1014.1 | 853.3 | 1014.0 | 858.4 | 1.0 | 1.0 |
| Minnesota     | 2016 | Low concern | Low concern | Low concern | Low concern | 134.0 | 121.1 | 90.8  | 1143.1 | 853.3 | 1039.5 | 858.4 | 0.9 | 1.0 |
| Mississippi   | 2016 | Unusable    | Low concern | Unusable    | Unusable    | 93.8  | 8.0   | 8.5   | 800.4  | 853.3 | 68.4   | 858.4 | 0.1 | 1.0 |
| Missouri      | 2016 | Low concern | Low concern | Low concern | Low concern | 129.1 | 128.3 | 99.9  | 1101.4 | 853.3 | 1101.4 | 858.4 | 1.0 | 1.0 |
| Montana       | 2016 | Low concern | Low concern | Low concern | Low concern | 77.3  | 76.8  | 99.9  | 659.2  | 853.3 | 659.2  | 858.4 | 1.0 | 1.0 |
| Nebraska      | 2016 | Low concern | Low concern | Low concern | Low concern | 112.9 | 112.2 | 99.9  | 963.1  | 853.3 | 963.1  | 858.4 | 1.0 | 1.0 |

|                |      |              |              |              |             |       |       |       |        |       |        |       |     |     |
|----------------|------|--------------|--------------|--------------|-------------|-------|-------|-------|--------|-------|--------|-------|-----|-----|
| Nevada         | 2016 | Low concern  | Low concern  | Low concern  | Low concern | 87.0  | 86.5  | 99.9  | 742.1  | 853.3 | 742.2  | 858.4 | 1.0 | 1.0 |
| New Hampshire  | 2016 | Low concern  | Low concern  | Low concern  | Low concern | 90.2  | 90.1  | 100.3 | 770.0  | 853.3 | 773.2  | 858.4 | 1.0 | 1.0 |
| New Jersey     | 2016 | Low concern  | Low concern  | Low concern  | Low concern | 119.9 | 119.6 | 100.3 | 1022.9 | 853.3 | 1026.6 | 858.4 | 1.0 | 1.0 |
| New Mexico     | 2016 | Low concern  | Low concern  | Low concern  | Low concern | 84.2  | 84.3  | 100.6 | 718.7  | 853.3 | 723.7  | 858.4 | 1.0 | 1.0 |
| New York       | 2016 | Low concern  | Low concern  | Low concern  | Low concern | 122.2 | 121.5 | 99.9  | 1042.7 | 853.3 | 1042.7 | 858.4 | 1.0 | 1.0 |
| North Carolina | 2016 | High concern | High concern | High concern | Low concern | 34.3  | 34.2  | 100.1 | 293.1  | 853.3 | 293.7  | 858.4 | 1.0 | 1.0 |
| North Dakota   | 2016 | Low concern  | Low concern  | Low concern  | Low concern | 77.5  | 78.1  | 101.2 | 661.6  | 853.3 | 670.4  | 858.4 | 1.0 | 1.0 |
| Ohio           | 2016 | Low concern  | Low concern  | Low concern  | Low concern | 142.7 | 142.4 | 100.3 | 1217.4 | 853.3 | 1222.3 | 858.4 | 1.0 | 1.0 |
| Oklahoma       | 2016 | Low concern  | Low concern  | Low concern  | Low concern | 100.0 | 100.8 | 101.3 | 853.3  | 853.3 | 865.6  | 858.4 | 1.0 | 1.0 |
| Oregon         | 2016 | Low concern  | Low concern  | Low concern  | Low concern | 90.6  | 90.3  | 100.2 | 773.3  | 853.3 | 775.4  | 858.4 | 1.0 | 1.0 |
| Pennsylvania   | 2016 | Low concern  | Low concern  | Low concern  | Low concern | 142.7 | 142.4 | 100.3 | 1218.0 | 853.3 | 1222.8 | 858.4 | 1.0 | 1.0 |
| Rhode Island   | 2016 | Low concern  | Low concern  | Low concern  | Low concern | 133.3 | 132.5 | 99.9  | 1137.4 | 853.3 | 1137.4 | 858.4 | 1.0 | 1.0 |
| South Carolina | 2016 | Low concern  | Low concern  | Low concern  | Low concern | 80.3  | 79.8  | 99.9  | 684.9  | 853.3 | 684.9  | 858.4 | 1.0 | 1.0 |
| South Dakota   | 2016 | Low concern  | Low concern  | Low concern  | Low concern | 79.8  | 79.6  | 100.2 | 681.0  | 853.3 | 683.0  | 858.4 | 1.0 | 1.0 |
| Tennessee      | 2016 | Low concern  | Low concern  | Low concern  | Low concern | 109.1 | 109.8 | 101.2 | 931.0  | 853.3 | 942.9  | 858.4 | 1.0 | 1.0 |
| Texas          | 2016 | Low concern  | Low concern  | Low concern  | Low concern | 105.7 | 105.1 | 99.9  | 901.6  | 853.3 | 901.9  | 858.4 | 1.0 | 1.0 |
| Utah           | 2016 | Low concern  | Low concern  | Low concern  | Low concern | 116.7 | 116.8 | 100.6 | 995.6  | 853.3 | 1002.9 | 858.4 | 1.0 | 1.0 |
| Vermont        | 2016 | Low concern  | Low concern  | Low concern  | Low concern | 134.1 | 133.3 | 99.9  | 1144.2 | 853.3 | 1144.2 | 858.4 | 1.0 | 1.0 |

|                      |      |                |                |                |             |       |       |       |        |       |        |       |     |     |
|----------------------|------|----------------|----------------|----------------|-------------|-------|-------|-------|--------|-------|--------|-------|-----|-----|
| Virginia             | 2016 | Low concern    | Low concern    | Low concern    | Low concern | 94.4  | 94.4  | 100.5 | 805.5  | 853.3 | 810.6  | 858.4 | 1.0 | 1.0 |
| Washington           | 2016 | Low concern    | Low concern    | Low concern    | Low concern | 104.5 | 104.1 | 100.1 | 891.9  | 853.3 | 893.4  | 858.4 | 1.0 | 1.0 |
| West Virginia        | 2016 | Low concern    | Low concern    | Low concern    | Low concern | 115.9 | 115.2 | 99.9  | 989.0  | 853.3 | 988.8  | 858.4 | 1.0 | 1.0 |
| Wisconsin            | 2016 | Low concern    | Low concern    | Low concern    | Low concern | 103.0 | 103.0 | 100.5 | 879.1  | 853.3 | 884.1  | 858.4 | 1.0 | 1.0 |
| Wyoming              | 2016 | Medium concern | Medium concern | Medium concern | Low concern | 73.3  | 73.0  | 100.1 | 625.3  | 853.3 | 626.5  | 858.4 | 1.0 | 1.0 |
| Alabama              | 2017 | Medium concern | Medium concern | Medium concern | Low concern | 66.0  | 65.4  | 100.0 | 572.6  | 868.0 | 573.3  | 876.2 | 1.0 | 1.0 |
| Alaska               | 2017 | Medium concern | Medium concern | Medium concern | Low concern | 63.8  | 63.3  | 100.1 | 553.6  | 868.0 | 554.9  | 876.2 | 1.0 | 1.0 |
| Arizona              | 2017 | Low concern    | Low concern    | Low concern    | Low concern | 92.2  | 91.3  | 99.9  | 800.2  | 868.0 | 800.2  | 876.2 | 1.0 | 1.0 |
| Arkansas             | 2017 | High concern   | High concern   | High concern   | Low concern | 44.0  | 43.7  | 100.0 | 382.1  | 868.0 | 382.5  | 876.2 | 1.0 | 1.0 |
| California           | 2017 | Low concern    | Low concern    | Low concern    | Low concern | 96.2  | 95.3  | 99.9  | 834.8  | 868.0 | 834.8  | 876.2 | 1.0 | 1.0 |
| Colorado             | 2017 | Medium concern | Medium concern | Medium concern | Low concern | 64.3  | 63.8  | 100.0 | 557.8  | 868.0 | 558.7  | 876.2 | 1.0 | 1.0 |
| Connecticut          | 2017 | Low concern    | Low concern    | Low concern    | Low concern | 115.5 | 114.8 | 100.2 | 1002.6 | 868.0 | 1006.1 | 876.2 | 1.0 | 1.0 |
| Delaware             | 2017 | Low concern    | Low concern    | Low concern    | Low concern | 84.7  | 84.0  | 100.0 | 735.0  | 868.0 | 736.2  | 876.2 | 1.0 | 1.0 |
| District of Columbia | 2017 | Low concern    | Low concern    | Low concern    | Low concern | 89.3  | 88.5  | 99.9  | 774.8  | 868.0 | 775.0  | 876.2 | 1.0 | 1.0 |
| Florida              | 2017 | High concern   | High concern   | High concern   | Low concern | 38.8  | 38.4  | 99.9  | 336.8  | 868.0 | 336.8  | 876.2 | 1.0 | 1.0 |
| Georgia              | 2017 | Low concern    | Low concern    | Low concern    | Low concern | 103.2 | 102.2 | 99.9  | 895.5  | 868.0 | 895.5  | 876.2 | 1.0 | 1.0 |
| Hawaii               | 2017 | Low concern    | Low concern    | Low concern    | Low concern | 79.2  | 78.4  | 99.9  | 687.0  | 868.0 | 687.0  | 876.2 | 1.0 | 1.0 |
| Idaho                | 2017 | Low concern    | Low concern    | Low concern    | Low concern | 102.2 | 101.3 | 99.9  | 887.2  | 868.0 | 887.2  | 876.2 | 1.0 | 1.0 |

|               |      |             |             |             |             |       |       |       |        |       |        |       |     |     |
|---------------|------|-------------|-------------|-------------|-------------|-------|-------|-------|--------|-------|--------|-------|-----|-----|
| Illinois      | 2017 | Low concern | Low concern | Low concern | Low concern | 92.4  | 92.1  | 100.5 | 802.0  | 868.0 | 807.2  | 876.2 | 1.0 | 1.0 |
| Indiana       | 2017 | Low concern | Low concern | Low concern | Low concern | 96.1  | 95.5  | 100.1 | 834.4  | 868.0 | 836.5  | 876.2 | 1.0 | 1.0 |
| Iowa          | 2017 | Low concern | Low concern | Low concern | Low concern | 90.0  | 89.2  | 99.9  | 781.6  | 868.0 | 781.6  | 876.2 | 1.0 | 1.0 |
| Kansas        | 2017 | Low concern | Low concern | Low concern | Low concern | 102.0 | 102.5 | 101.3 | 885.2  | 868.0 | 898.0  | 876.2 | 1.0 | 1.0 |
| Kentucky      | 2017 | Low concern | Low concern | Low concern | Low concern | 134.6 | 133.8 | 100.2 | 1168.5 | 868.0 | 1172.6 | 876.2 | 1.0 | 1.0 |
| Louisiana     | 2017 | Low concern | Low concern | Low concern | Low concern | 105.5 | 104.5 | 99.9  | 915.7  | 868.0 | 915.7  | 876.2 | 1.0 | 1.0 |
| Maine         | 2017 | Low concern | Low concern | Low concern | Low concern | 110.0 | 109.1 | 100.1 | 954.5  | 868.0 | 956.3  | 876.2 | 1.0 | 1.0 |
| Maryland      | 2017 | Low concern | Low concern | Low concern | Low concern | 115.3 | 114.2 | 99.9  | 1000.5 | 868.0 | 1000.5 | 876.2 | 1.0 | 1.0 |
| Massachusetts | 2017 | Low concern | Low concern | Low concern | Low concern | 118.7 | 117.8 | 100.0 | 1030.7 | 868.0 | 1031.8 | 876.2 | 1.0 | 1.0 |
| Michigan      | 2017 | Low concern | Low concern | Low concern | Low concern | 124.9 | 123.7 | 99.9  | 1084.3 | 868.0 | 1084.2 | 876.2 | 1.0 | 1.0 |
| Minnesota     | 2017 | Low concern | Low concern | Low concern | Low concern | 122.0 | 114.7 | 94.8  | 1058.8 | 868.0 | 1005.0 | 876.2 | 0.9 | 1.0 |
| Mississippi   | 2017 | Low concern | Low concern | Low concern | Low concern | 91.9  | 91.0  | 99.9  | 797.5  | 868.0 | 797.5  | 876.2 | 1.0 | 1.0 |
| Missouri      | 2017 | Low concern | Low concern | Low concern | Low concern | 129.9 | 128.7 | 99.9  | 1127.4 | 868.0 | 1127.4 | 876.2 | 1.0 | 1.0 |
| Montana       | 2017 | Low concern | Low concern | Low concern | Low concern | 92.9  | 92.1  | 99.9  | 806.6  | 868.0 | 806.6  | 876.2 | 1.0 | 1.0 |
| Nebraska      | 2017 | Low concern | Low concern | Low concern | Low concern | 119.0 | 120.8 | 102.3 | 1033.0 | 868.0 | 1058.3 | 876.2 | 1.0 | 1.0 |
| Nevada        | 2017 | Low concern | Low concern | Low concern | Low concern | 90.8  | 89.9  | 99.9  | 787.8  | 868.0 | 787.8  | 876.2 | 1.0 | 1.0 |
| New Hampshire | 2017 | Low concern | Low concern | Low concern | Low concern | 88.6  | 87.9  | 100.1 | 768.7  | 868.0 | 770.2  | 876.2 | 1.0 | 1.0 |
| New Jersey    | 2017 | Low concern | Low concern | Low concern | Low concern | 121.3 | 120.7 | 100.3 | 1052.8 | 868.0 | 1057.7 | 876.2 | 1.0 | 1.0 |

|                |      |                |              |                |             |       |       |       |        |       |        |       |     |     |
|----------------|------|----------------|--------------|----------------|-------------|-------|-------|-------|--------|-------|--------|-------|-----|-----|
| New Mexico     | 2017 | Low concern    | Low concern  | Low concern    | Low concern | 80.6  | 80.8  | 101.1 | 699.4  | 868.0 | 707.7  | 876.2 | 1.0 | 1.0 |
| New York       | 2017 | Low concern    | Low concern  | Low concern    | Low concern | 124.1 | 123.0 | 99.9  | 1077.4 | 868.0 | 1077.7 | 876.2 | 1.0 | 1.0 |
| North Carolina | 2017 | High concern   | High concern | High concern   | Low concern | 19.1  | 19.0  | 100.0 | 165.9  | 868.0 | 166.2  | 876.2 | 1.0 | 1.0 |
| North Dakota   | 2017 | Low concern    | Low concern  | Low concern    | Low concern | 82.6  | 83.6  | 102.1 | 716.7  | 868.0 | 732.6  | 876.2 | 1.0 | 1.0 |
| Ohio           | 2017 | Low concern    | Low concern  | Low concern    | Low concern | 141.6 | 141.0 | 100.3 | 1229.5 | 868.0 | 1235.0 | 876.2 | 1.0 | 1.0 |
| Oklahoma       | 2017 | Low concern    | Low concern  | Low concern    | Low concern | 102.2 | 102.9 | 101.5 | 886.9  | 868.0 | 901.3  | 876.2 | 1.0 | 1.0 |
| Oregon         | 2017 | Low concern    | Low concern  | Low concern    | Low concern | 89.5  | 88.9  | 100.2 | 777.2  | 868.0 | 779.3  | 876.2 | 1.0 | 1.0 |
| Pennsylvania   | 2017 | Low concern    | Low concern  | Low concern    | Low concern | 136.9 | 136.2 | 100.3 | 1188.4 | 868.0 | 1193.0 | 876.2 | 1.0 | 1.0 |
| Rhode Island   | 2017 | Low concern    | Low concern  | Low concern    | Low concern | 133.7 | 132.4 | 99.9  | 1160.2 | 868.0 | 1160.2 | 876.2 | 1.0 | 1.0 |
| South Carolina | 2017 | Low concern    | Low concern  | Low concern    | Low concern | 82.2  | 81.4  | 99.9  | 713.5  | 868.0 | 713.5  | 876.2 | 1.0 | 1.0 |
| South Dakota   | 2017 | Medium concern | Low concern  | Medium concern | Low concern | 75.0  | 74.5  | 100.1 | 651.4  | 868.0 | 653.0  | 876.2 | 1.0 | 1.0 |
| Tennessee      | 2017 | Low concern    | Low concern  | Low concern    | Low concern | 101.7 | 101.8 | 100.9 | 883.1  | 868.0 | 892.0  | 876.2 | 1.0 | 1.0 |
| Texas          | 2017 | Low concern    | Low concern  | Low concern    | Low concern | 103.0 | 102.1 | 99.9  | 894.3  | 868.0 | 894.6  | 876.2 | 1.0 | 1.0 |
| Utah           | 2017 | Low concern    | Low concern  | Low concern    | Low concern | 118.4 | 118.2 | 100.6 | 1028.0 | 868.0 | 1035.5 | 876.2 | 1.0 | 1.0 |
| Vermont        | 2017 | Low concern    | Low concern  | Low concern    | Low concern | 132.6 | 131.4 | 99.9  | 1151.1 | 868.0 | 1151.1 | 876.2 | 1.0 | 1.0 |
| Virginia       | 2017 | Low concern    | Low concern  | Low concern    | Low concern | 91.3  | 91.4  | 100.9 | 792.3  | 868.0 | 800.4  | 876.2 | 1.0 | 1.0 |
| Washington     | 2017 | Low concern    | Low concern  | Low concern    | Low concern | 103.2 | 102.4 | 100.0 | 896.2  | 868.0 | 897.0  | 876.2 | 1.0 | 1.0 |
| West Virginia  | 2017 | Low concern    | Low concern  | Low concern    | Low concern | 122.0 | 120.9 | 99.9  | 1059.3 | 868.0 | 1059.3 | 876.2 | 1.0 | 1.0 |

|                      |      |                |                |                |             |       |       |       |       |       |       |       |     |     |
|----------------------|------|----------------|----------------|----------------|-------------|-------|-------|-------|-------|-------|-------|-------|-----|-----|
| Wisconsin            | 2017 | Low concern    | Low concern    | Low concern    | Low concern | 100.0 | 100.0 | 100.8 | 868.0 | 868.0 | 876.2 | 876.2 | 1.0 | 1.0 |
| Wyoming              | 2017 | Low concern    | Low concern    | Low concern    | Low concern | 89.2  | 88.6  | 100.1 | 774.5 | 868.0 | 776.3 | 876.2 | 1.0 | 1.0 |
| Alabama              | 2018 | Medium concern | Medium concern | Medium concern | Low concern | 61.3  | 61.2  | 100.0 | 509.4 | 831.4 | 509.9 | 832.6 | 1.0 | 1.0 |
| Alaska               | 2018 | Medium concern | Medium concern | Medium concern | Low concern | 67.5  | 67.6  | 100.1 | 561.0 | 831.4 | 562.5 | 832.6 | 1.0 | 1.0 |
| Arizona              | 2018 | Low concern    | Low concern    | Low concern    | Low concern | 96.2  | 96.0  | 99.9  | 799.5 | 831.4 | 799.5 | 832.6 | 1.0 | 1.0 |
| Arkansas             | 2018 | Medium concern | Medium concern | Medium concern | Low concern | 60.9  | 60.8  | 99.9  | 506.2 | 831.4 | 506.4 | 832.6 | 1.0 | 1.0 |
| California           | 2018 | Low concern    | Low concern    | Low concern    | Low concern | 102.6 | 102.4 | 99.9  | 853.0 | 831.4 | 853.0 | 832.6 | 1.0 | 1.0 |
| Colorado             | 2018 | Medium concern | Medium concern | Medium concern | Low concern | 64.5  | 64.6  | 100.1 | 536.5 | 831.4 | 537.6 | 832.6 | 1.0 | 1.0 |
| Connecticut          | 2018 | Low concern    | Low concern    | Low concern    | Low concern | 117.0 | 117.3 | 100.3 | 972.6 | 831.4 | 976.5 | 832.6 | 1.0 | 1.0 |
| Delaware             | 2018 | Low concern    | Low concern    | Low concern    | Low concern | 100.0 | 100.0 | 100.0 | 831.4 | 831.4 | 832.6 | 832.6 | 1.0 | 1.0 |
| District of Columbia | 2018 | Low concern    | Low concern    | Low concern    | Low concern | 94.4  | 94.3  | 99.9  | 784.8 | 831.4 | 784.9 | 832.6 | 1.0 | 1.0 |
| Florida              | 2018 | Low concern    | Low concern    | Low concern    | Low concern | 83.1  | 83.0  | 99.9  | 690.9 | 831.4 | 690.9 | 832.6 | 1.0 | 1.0 |
| Georgia              | 2018 | Low concern    | Low concern    | Low concern    | Low concern | 97.7  | 97.6  | 99.9  | 812.5 | 831.4 | 812.5 | 832.6 | 1.0 | 1.0 |
| Hawaii               | 2018 | Low concern    | Low concern    | Low concern    | Low concern | 79.9  | 79.8  | 99.9  | 664.3 | 831.4 | 664.3 | 832.6 | 1.0 | 1.0 |
| Idaho                | 2018 | Low concern    | Low concern    | Low concern    | Low concern | 106.7 | 106.5 | 99.9  | 886.7 | 831.4 | 886.7 | 832.6 | 1.0 | 1.0 |
| Illinois             | 2018 | Low concern    | Low concern    | Low concern    | Low concern | 89.8  | 90.3  | 100.7 | 746.3 | 831.4 | 752.2 | 832.6 | 1.0 | 1.0 |
| Indiana              | 2018 | Low concern    | Low concern    | Low concern    | Low concern | 107.7 | 107.8 | 100.1 | 895.3 | 831.4 | 897.3 | 832.6 | 1.0 | 1.0 |
| Iowa                 | 2018 | Low concern    | Low concern    | Low concern    | Low concern | 95.4  | 95.2  | 99.9  | 792.8 | 831.4 | 792.8 | 832.6 | 1.0 | 1.0 |

|                |      |              |              |              |             |       |       |       |        |       |        |       |     |     |
|----------------|------|--------------|--------------|--------------|-------------|-------|-------|-------|--------|-------|--------|-------|-----|-----|
| Kansas         | 2018 | Low concern  | Low concern  | Low concern  | Low concern | 97.6  | 98.7  | 101.1 | 811.7  | 831.4 | 821.4  | 832.6 | 1.0 | 1.0 |
| Kentucky       | 2018 | Low concern  | Low concern  | Low concern  | Low concern | 142.5 | 142.7 | 100.2 | 1184.9 | 831.4 | 1188.3 | 832.6 | 1.0 | 1.0 |
| Louisiana      | 2018 | Low concern  | Low concern  | Low concern  | Low concern | 115.4 | 115.3 | 99.9  | 959.7  | 831.4 | 959.7  | 832.6 | 1.0 | 1.0 |
| Maine          | 2018 | Low concern  | Low concern  | Low concern  | Low concern | 105.6 | 105.6 | 100.1 | 877.7  | 831.4 | 879.4  | 832.6 | 1.0 | 1.0 |
| Maryland       | 2018 | Low concern  | Low concern  | Low concern  | Low concern | 123.8 | 123.6 | 99.9  | 1029.3 | 831.4 | 1029.3 | 832.6 | 1.0 | 1.0 |
| Massachusetts  | 2018 | Low concern  | Low concern  | Low concern  | Low concern | 131.3 | 131.3 | 100.0 | 1091.9 | 831.4 | 1093.1 | 832.6 | 1.0 | 1.0 |
| Michigan       | 2018 | Low concern  | Low concern  | Low concern  | Low concern | 127.7 | 127.5 | 99.9  | 1061.3 | 831.4 | 1061.3 | 832.6 | 1.0 | 1.0 |
| Minnesota      | 2018 | Low concern  | Low concern  | Low concern  | Low concern | 127.6 | 122.7 | 96.2  | 1060.8 | 831.4 | 1021.2 | 832.6 | 1.0 | 1.0 |
| Mississippi    | 2018 | Low concern  | Low concern  | Low concern  | Low concern | 94.5  | 94.4  | 99.9  | 786.1  | 831.4 | 786.1  | 832.6 | 1.0 | 1.0 |
| Missouri       | 2018 | Low concern  | Low concern  | Low concern  | Low concern | 132.8 | 132.6 | 99.9  | 1104.3 | 831.4 | 1104.3 | 832.6 | 1.0 | 1.0 |
| Montana        | 2018 | Low concern  | Low concern  | Low concern  | Low concern | 93.4  | 93.3  | 99.9  | 776.8  | 831.4 | 776.8  | 832.6 | 1.0 | 1.0 |
| Nebraska       | 2018 | Low concern  | Low concern  | Low concern  | Low concern | 123.1 | 123.1 | 100.0 | 1023.4 | 831.4 | 1024.9 | 832.6 | 1.0 | 1.0 |
| Nevada         | 2018 | Low concern  | Low concern  | Low concern  | Low concern | 83.3  | 83.2  | 99.9  | 692.7  | 831.4 | 692.8  | 832.6 | 1.0 | 1.0 |
| New Hampshire  | 2018 | Low concern  | Low concern  | Low concern  | Low concern | 98.2  | 98.3  | 100.1 | 816.7  | 831.4 | 818.5  | 832.6 | 1.0 | 1.0 |
| New Jersey     | 2018 | Low concern  | Low concern  | Low concern  | Low concern | 128.3 | 128.7 | 100.4 | 1066.7 | 831.4 | 1071.8 | 832.6 | 1.0 | 1.0 |
| New Mexico     | 2018 | Low concern  | Low concern  | Low concern  | Low concern | 85.7  | 86.5  | 101.0 | 712.2  | 831.4 | 720.1  | 832.6 | 1.0 | 1.0 |
| New York       | 2018 | Low concern  | Low concern  | Low concern  | Low concern | 135.8 | 135.7 | 99.9  | 1129.3 | 831.4 | 1129.6 | 832.6 | 1.0 | 1.0 |
| North Carolina | 2018 | High concern | High concern | High concern | Low concern | 18.4  | 18.4  | 100.0 | 152.6  | 831.4 | 152.8  | 832.6 | 1.0 | 1.0 |



|                |      |                |                |                |             |       |       |       |        |       |        |       |     |     |
|----------------|------|----------------|----------------|----------------|-------------|-------|-------|-------|--------|-------|--------|-------|-----|-----|
| North Dakota   | 2018 | Low concern    | Low concern    | Low concern    | Low concern | 88.4  | 89.1  | 100.8 | 734.7  | 831.4 | 741.5  | 832.6 | 1.0 | 1.0 |
| Ohio           | 2018 | Medium concern | Medium concern | Medium concern | Low concern | 150.8 | 151.5 | 100.5 | 1254.0 | 831.4 | 1261.7 | 832.6 | 1.0 | 1.0 |
| Oklahoma       | 2018 | Low concern    | Low concern    | Low concern    | Low concern | 101.9 | 103.5 | 101.6 | 847.4  | 831.4 | 861.9  | 832.6 | 1.0 | 1.0 |
| Oregon         | 2018 | Low concern    | Low concern    | Low concern    | Low concern | 96.8  | 96.9  | 100.1 | 805.0  | 831.4 | 806.8  | 832.6 | 1.0 | 1.0 |
| Pennsylvania   | 2018 | Low concern    | Low concern    | Low concern    | Low concern | 137.5 | 137.8 | 100.2 | 1143.3 | 831.4 | 1147.0 | 832.6 | 1.0 | 1.0 |
| Rhode Island   | 2018 | High concern   | High concern   | High concern   | Low concern | 256.9 | 256.5 | 99.9  | 2135.7 | 831.4 | 2135.7 | 832.6 | 1.0 | 1.0 |
| South Carolina | 2018 | Low concern    | Low concern    | Low concern    | Low concern | 81.8  | 81.7  | 99.9  | 680.3  | 831.4 | 680.3  | 832.6 | 1.0 | 1.0 |
| South Dakota   | 2018 | Low concern    | Low concern    | Low concern    | Low concern | 77.6  | 77.7  | 100.2 | 644.8  | 831.4 | 646.7  | 832.6 | 1.0 | 1.0 |
| Tennessee      | 2018 | Low concern    | Low concern    | Low concern    | Low concern | 98.0  | 98.2  | 100.3 | 814.5  | 831.4 | 817.9  | 832.6 | 1.0 | 1.0 |
| Texas          | 2018 | Low concern    | Low concern    | Low concern    | Low concern | 103.8 | 103.7 | 99.9  | 863.3  | 831.4 | 863.5  | 832.6 | 1.0 | 1.0 |
| Utah           | 2018 | Low concern    | Low concern    | Low concern    | Low concern | 116.3 | 116.9 | 100.5 | 967.2  | 831.4 | 973.6  | 832.6 | 1.0 | 1.0 |
| Vermont        | 2018 | Low concern    | Low concern    | Low concern    | Low concern | 127.9 | 127.7 | 99.9  | 1063.2 | 831.4 | 1063.2 | 832.6 | 1.0 | 1.0 |
| Virginia       | 2018 | Low concern    | Low concern    | Low concern    | Low concern | 96.5  | 97.0  | 100.6 | 802.0  | 831.4 | 807.7  | 832.6 | 1.0 | 1.0 |
| Washington     | 2018 | Low concern    | Low concern    | Low concern    | Low concern | 108.0 | 108.0 | 100.0 | 898.2  | 831.4 | 899.0  | 832.6 | 1.0 | 1.0 |
| West Virginia  | 2018 | Low concern    | Low concern    | Low concern    | Low concern | 133.9 | 133.7 | 99.9  | 1113.2 | 831.4 | 1113.2 | 832.6 | 1.0 | 1.0 |
| Wisconsin      | 2018 | Low concern    | Low concern    | Low concern    | Low concern | 105.1 | 105.4 | 100.4 | 873.5  | 831.4 | 877.7  | 832.6 | 1.0 | 1.0 |
| Wyoming        | 2018 | Low concern    | Low concern    | Low concern    | Low concern | 93.5  | 93.5  | 100.1 | 777.0  | 831.4 | 778.6  | 832.6 | 1.0 | 1.0 |
| Alabama        | 2019 | High concern   | High concern   | High concern   | Low concern | 43.8  | 43.8  | 100.0 | 380.1  | 868.6 | 380.5  | 868.6 | 1.0 | 1.0 |

|                      |      |                |                |                |             |       |       |       |        |       |        |       |     |     |
|----------------------|------|----------------|----------------|----------------|-------------|-------|-------|-------|--------|-------|--------|-------|-----|-----|
| Alaska               | 2019 | Medium concern | Medium concern | Medium concern | Low concern | 67.4  | 67.5  | 100.1 | 585.0  | 868.6 | 586.3  | 868.6 | 1.0 | 1.0 |
| Arizona              | 2019 | Low concern    | Low concern    | Low concern    | Low concern | 96.0  | 96.0  | 99.9  | 834.1  | 868.6 | 834.1  | 868.6 | 1.0 | 1.0 |
| Arkansas             | 2019 | Medium concern | Medium concern | Medium concern | Low concern | 59.2  | 59.2  | 100.0 | 514.1  | 868.6 | 514.4  | 868.6 | 1.0 | 1.0 |
| California           | 2019 | Low concern    | Low concern    | Low concern    | Low concern | 100.0 | 100.0 | 99.9  | 868.6  | 868.6 | 868.6  | 868.6 | 1.0 | 1.0 |
| Colorado             | 2019 | Medium concern | Medium concern | Medium concern | Low concern | 62.8  | 62.9  | 100.1 | 545.4  | 868.6 | 546.6  | 868.6 | 1.0 | 1.0 |
| Connecticut          | 2019 | Low concern    | Low concern    | Low concern    | Low concern | 114.2 | 114.5 | 100.2 | 991.6  | 868.6 | 994.5  | 868.6 | 1.0 | 1.0 |
| Delaware             | 2019 | Low concern    | Low concern    | Low concern    | Low concern | 121.3 | 121.4 | 100.0 | 1053.7 | 868.6 | 1054.8 | 868.6 | 1.0 | 1.0 |
| District of Columbia | 2019 | Low concern    | Low concern    | Low concern    | Low concern | 98.4  | 98.4  | 99.9  | 854.8  | 868.6 | 855.1  | 868.6 | 1.0 | 1.0 |
| Florida              | 2019 | Low concern    | Low concern    | Low concern    | Low concern | 78.1  | 78.1  | 99.9  | 678.6  | 868.6 | 678.6  | 868.6 | 1.0 | 1.0 |
| Georgia              | 2019 | Low concern    | Low concern    | Low concern    | Low concern | 93.9  | 93.9  | 99.9  | 815.8  | 868.6 | 815.8  | 868.6 | 1.0 | 1.0 |
| Hawaii               | 2019 | Medium concern | Medium concern | Medium concern | Low concern | 71.2  | 71.2  | 99.9  | 618.8  | 868.6 | 618.8  | 868.6 | 1.0 | 1.0 |
| Idaho                | 2019 | Low concern    | Low concern    | Low concern    | Low concern | 102.2 | 102.2 | 99.9  | 887.6  | 868.6 | 887.6  | 868.6 | 1.0 | 1.0 |
| Illinois             | 2019 | Low concern    | Low concern    | Low concern    | Low concern | 89.7  | 90.9  | 101.3 | 778.8  | 868.6 | 789.6  | 868.6 | 1.0 | 1.0 |
| Indiana              | 2019 | Low concern    | Low concern    | Low concern    | Low concern | 104.2 | 104.3 | 100.0 | 904.8  | 868.6 | 905.8  | 868.6 | 1.0 | 1.0 |
| Iowa                 | 2019 | Low concern    | Low concern    | Low concern    | Low concern | 88.8  | 88.8  | 99.9  | 771.5  | 868.6 | 771.5  | 868.6 | 1.0 | 1.0 |
| Kansas               | 2019 | Low concern    | Low concern    | Low concern    | Low concern | 93.1  | 94.6  | 101.5 | 809.0  | 868.6 | 822.0  | 868.6 | 1.0 | 1.0 |
| Kentucky             | 2019 | Low concern    | Low concern    | Low concern    | Low concern | 137.1 | 137.5 | 100.2 | 1190.9 | 868.6 | 1194.1 | 868.6 | 1.0 | 1.0 |
| Louisiana            | 2019 | Low concern    | Low concern    | Low concern    | Low concern | 108.5 | 108.5 | 99.9  | 942.4  | 868.6 | 942.4  | 868.6 | 1.0 | 1.0 |

|                |      |              |              |              |             |       |       |       |        |       |        |       |     |     |
|----------------|------|--------------|--------------|--------------|-------------|-------|-------|-------|--------|-------|--------|-------|-----|-----|
| Maine          | 2019 | Low concern  | Low concern  | Low concern  | Low concern | 100.2 | 100.4 | 100.1 | 870.5  | 868.6 | 872.3  | 868.6 | 1.0 | 1.0 |
| Maryland       | 2019 | Low concern  | Low concern  | Low concern  | Low concern | 120.8 | 120.8 | 99.9  | 1049.5 | 868.6 | 1049.5 | 868.6 | 1.0 | 1.0 |
| Massachusetts  | 2019 | Low concern  | Low concern  | Low concern  | Low concern | 130.0 | 130.2 | 100.0 | 1129.5 | 868.6 | 1131.0 | 868.6 | 1.0 | 1.0 |
| Michigan       | 2019 | Low concern  | Low concern  | Low concern  | Low concern | 116.7 | 116.7 | 99.9  | 1013.4 | 868.6 | 1013.4 | 868.6 | 1.0 | 1.0 |
| Minnesota      | 2019 | Low concern  | Low concern  | Low concern  | Low concern | 121.4 | 121.6 | 100.0 | 1054.4 | 868.6 | 1056.1 | 868.6 | 1.0 | 1.0 |
| Mississippi    | 2019 | Low concern  | Low concern  | Low concern  | Low concern | 88.8  | 88.8  | 99.9  | 771.1  | 868.6 | 771.2  | 868.6 | 1.0 | 1.0 |
| Missouri       | 2019 | Low concern  | Low concern  | Low concern  | Low concern | 136.0 | 136.0 | 99.9  | 1181.6 | 868.6 | 1181.6 | 868.6 | 1.0 | 1.0 |
| Montana        | 2019 | Low concern  | Low concern  | Low concern  | Low concern | 99.1  | 99.1  | 99.9  | 860.9  | 868.6 | 860.9  | 868.6 | 1.0 | 1.0 |
| Nebraska       | 2019 | Low concern  | Low concern  | Low concern  | Low concern | 106.2 | 106.3 | 100.0 | 922.2  | 868.6 | 923.2  | 868.6 | 1.0 | 1.0 |
| Nevada         | 2019 | Low concern  | Low concern  | Low concern  | Low concern | 96.2  | 96.3  | 100.0 | 836.0  | 868.6 | 836.7  | 868.6 | 1.0 | 1.0 |
| New Hampshire  | 2019 | Low concern  | Low concern  | Low concern  | Low concern | 106.2 | 106.4 | 100.1 | 922.4  | 868.6 | 924.4  | 868.6 | 1.0 | 1.0 |
| New Jersey     | 2019 | Low concern  | Low concern  | Low concern  | Low concern | 124.2 | 124.8 | 100.4 | 1078.6 | 868.6 | 1083.6 | 868.6 | 1.0 | 1.0 |
| New Mexico     | 2019 | Low concern  | Low concern  | Low concern  | Low concern | 81.8  | 82.7  | 101.0 | 710.7  | 868.6 | 718.4  | 868.6 | 1.0 | 1.0 |
| New York       | 2019 | Low concern  | Low concern  | Low concern  | Low concern | 133.6 | 133.6 | 99.9  | 1160.0 | 868.6 | 1160.3 | 868.6 | 1.0 | 1.0 |
| North Carolina | 2019 | High concern | High concern | High concern | Low concern | 16.4  | 16.5  | 100.1 | 142.6  | 868.6 | 143.0  | 868.6 | 1.0 | 1.0 |
| North Dakota   | 2019 | Low concern  | Low concern  | Low concern  | Low concern | 78.6  | 79.0  | 100.4 | 682.3  | 868.6 | 685.8  | 868.6 | 1.0 | 1.0 |
| Ohio           | 2019 | Low concern  | Low concern  | Low concern  | Low concern | 145.9 | 146.7 | 100.5 | 1266.9 | 868.6 | 1274.5 | 868.6 | 1.0 | 1.0 |
| Oklahoma       | 2019 | Low concern  | Low concern  | Low concern  | Low concern | 94.7  | 96.3  | 101.6 | 822.6  | 868.6 | 836.7  | 868.6 | 1.0 | 1.0 |

|                |      |              |              |              |             |       |       |       |        |       |        |       |     |     |
|----------------|------|--------------|--------------|--------------|-------------|-------|-------|-------|--------|-------|--------|-------|-----|-----|
| Oregon         | 2019 | Low concern  | Low concern  | Low concern  | Low concern | 96.0  | 96.1  | 100.0 | 834.1  | 868.6 | 834.9  | 868.6 | 1.0 | 1.0 |
| Pennsylvania   | 2019 | Low concern  | Low concern  | Low concern  | Low concern | 133.2 | 133.6 | 100.2 | 1157.1 | 868.6 | 1160.3 | 868.6 | 1.0 | 1.0 |
| Rhode Island   | 2019 | High concern | High concern | High concern | Low concern | 214.6 | 214.6 | 99.9  | 1864.3 | 868.6 | 1864.3 | 868.6 | 1.0 | 1.0 |
| South Carolina | 2019 | Low concern  | Low concern  | Low concern  | Low concern | 77.3  | 77.3  | 99.9  | 671.6  | 868.6 | 671.6  | 868.6 | 1.0 | 1.0 |
| South Dakota   | 2019 | Low concern  | Low concern  | Low concern  | Low concern | 81.8  | 81.9  | 100.1 | 710.2  | 868.6 | 711.7  | 868.6 | 1.0 | 1.0 |
| Tennessee      | 2019 | Low concern  | Low concern  | Low concern  | Low concern | 86.2  | 86.5  | 100.2 | 749.0  | 868.6 | 751.6  | 868.6 | 1.0 | 1.0 |
| Texas          | 2019 | Low concern  | Low concern  | Low concern  | Low concern | 94.8  | 94.8  | 99.9  | 823.3  | 868.6 | 823.5  | 868.6 | 1.0 | 1.0 |
| Utah           | 2019 | Low concern  | Low concern  | Low concern  | Low concern | 115.5 | 116.2 | 100.6 | 1002.9 | 868.6 | 1009.7 | 868.6 | 1.0 | 1.0 |
| Vermont        | 2019 | Low concern  | Low concern  | Low concern  | Low concern | 127.6 | 127.6 | 99.9  | 1108.1 | 868.6 | 1108.1 | 868.6 | 1.0 | 1.0 |
| Virginia       | 2019 | Low concern  | Low concern  | Low concern  | Low concern | 105.2 | 105.5 | 100.1 | 914.0  | 868.6 | 916.1  | 868.6 | 1.0 | 1.0 |
| Washington     | 2019 | Low concern  | Low concern  | Low concern  | Low concern | 110.0 | 110.1 | 100.0 | 955.5  | 868.6 | 956.3  | 868.6 | 1.0 | 1.0 |
| West Virginia  | 2019 | Low concern  | Low concern  | Low concern  | Low concern | 130.3 | 130.1 | 99.8  | 1131.6 | 868.6 | 1130.4 | 868.6 | 1.0 | 1.0 |
| Wisconsin      | 2019 | Low concern  | Low concern  | Low concern  | Low concern | 101.1 | 101.5 | 100.3 | 878.0  | 868.6 | 881.4  | 868.6 | 1.0 | 1.0 |
| Wyoming        | 2019 | Low concern  | Low concern  | Low concern  | Low concern | 81.1  | 81.3  | 100.2 | 704.2  | 868.6 | 706.1  | 868.6 | 1.0 | 1.0 |

### Supplement Section 3. Staggered Difference-in-differences model specification

We assessed the association of the policy with each of our outcomes using a staggered difference-in-differences model as described in Sun and Abraham, 2021<sup>7</sup>. We modeled our outcome using a linear probability model with the following form:

$$Y_{ist} = \beta_0 + \vec{\beta}_1 \overrightarrow{\text{Wave}}_{is} + \vec{\beta}_2 \overrightarrow{\text{Month}}_{it} + \vec{\beta}_3 \overrightarrow{\text{Wave}}_{is} \overrightarrow{\text{MonthsFromPolicy}}_{ist} + \vec{\beta}_4 \vec{X}_{ist} + \varepsilon_{ist}$$

Where  $Y_{ist}$  represents the outcome  $Y$  for delivery  $i$  in state  $s$  and month  $t$ ,  $\beta_0$  is the intercept,  $\vec{\beta}_1 \overrightarrow{\text{Wave}}_{is}$  is a vector of policy implementation wave fixed effects to account for baseline differences between implementation wave, and  $\vec{\beta}_2 \overrightarrow{\text{Month}}_{it}$  is a vector of month fixed effects to account for nationwide secular time trends. Our coefficients of interest are  $\vec{\beta}_3$ , representing the policy effect estimates associated with each policy in each month pre- and post-implementation.  $\overrightarrow{\text{Wave}}_{is} \overrightarrow{\text{MonthsFromPolicy}}_{ist}$  is a vector of interaction terms between the policy implementation wave of the state the policy occurred in  $\overrightarrow{\text{Wave}}_{is}$  and the months since the policy implementation in that wave. These interaction terms are only created for months that have study data, and we exclude terms for the period three months prior to the policy as a reference group to avoid overparameterizing the model and to allow for short term anticipatory effects prior to the policy implementation. For example, wave 1 implemented the policy 5 months after the start of the study period, and thus we will create interaction terms for months four and two through one months prior to study and for months 0 through 33 months following the implementation of the policy. In total, the model contains 113 such interaction terms.  $\vec{\beta}_4 \vec{X}_{ist}$  controls for the effect of patient and state characteristics  $\vec{X}_{ist}$ , and  $\varepsilon_{ist}$  represents the normally distributed error term.

Aggregate measures of treatment effect at the population level, the month-level, and the policy implementation wave level were estimated by averaging the interaction term coefficients weighted by the relative population size captured by each month and wave combination. We used a post-hoc Huber-White cluster robust standard error correction to cluster the standard errors at the state level.

### Supplemental Section 4. Unadjusted time trends for secondary outcomes

Supplemental eFigure 2. Unadjusted monthly rates of Interval LARC over time stratified by policy implementation wave

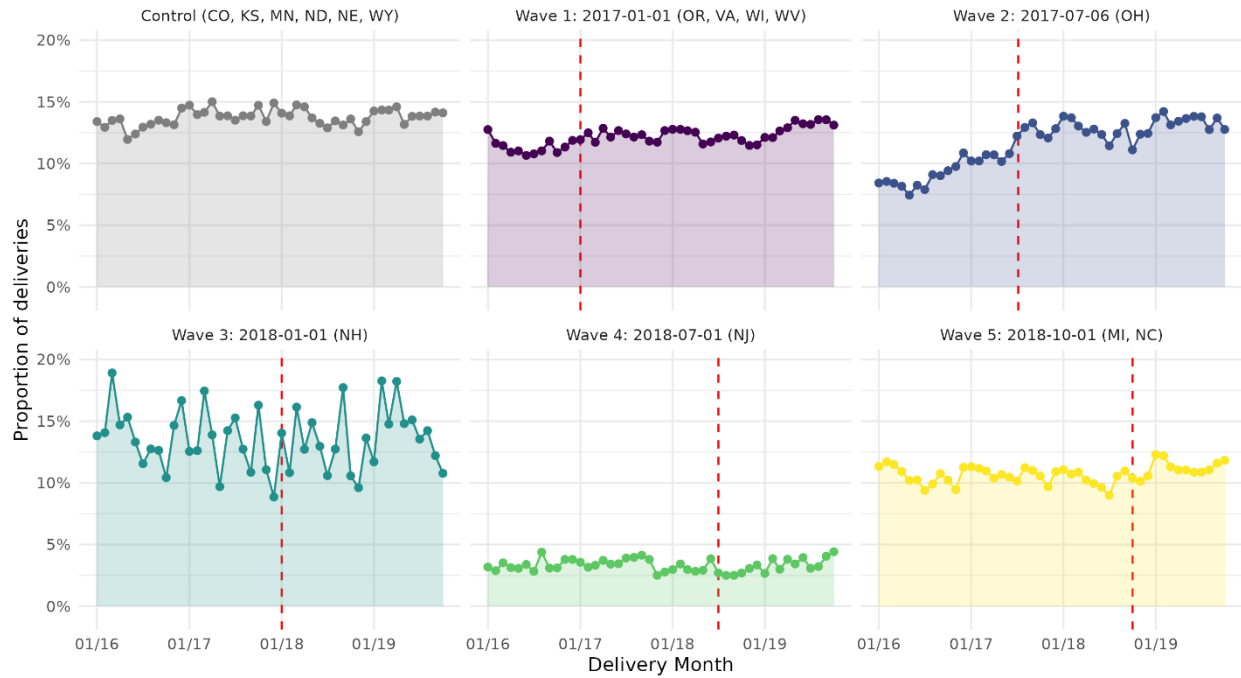

Supplemental eFigure 3. Unadjusted monthly rates of 7-day postpartum sterilization over time stratified by policy implementation wave

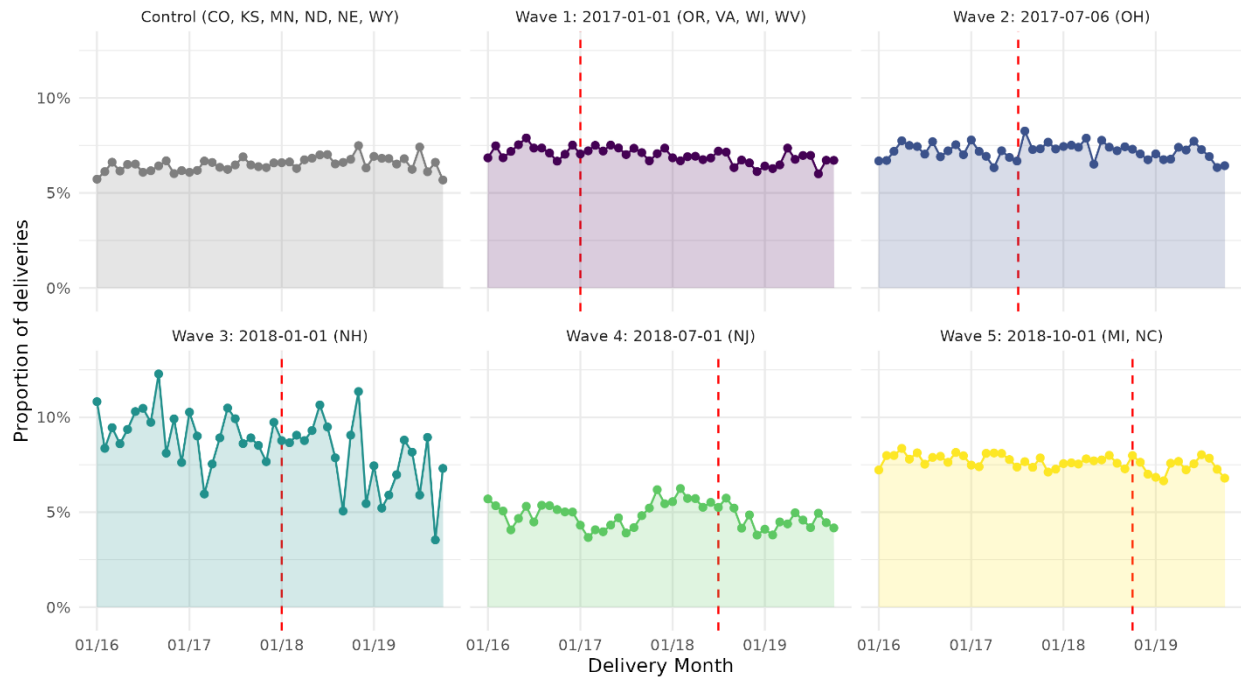

Supplemental eFigure 4. Unadjusted monthly rates of 7-day most or moderately effective contraception use over time stratified by policy implementation wave

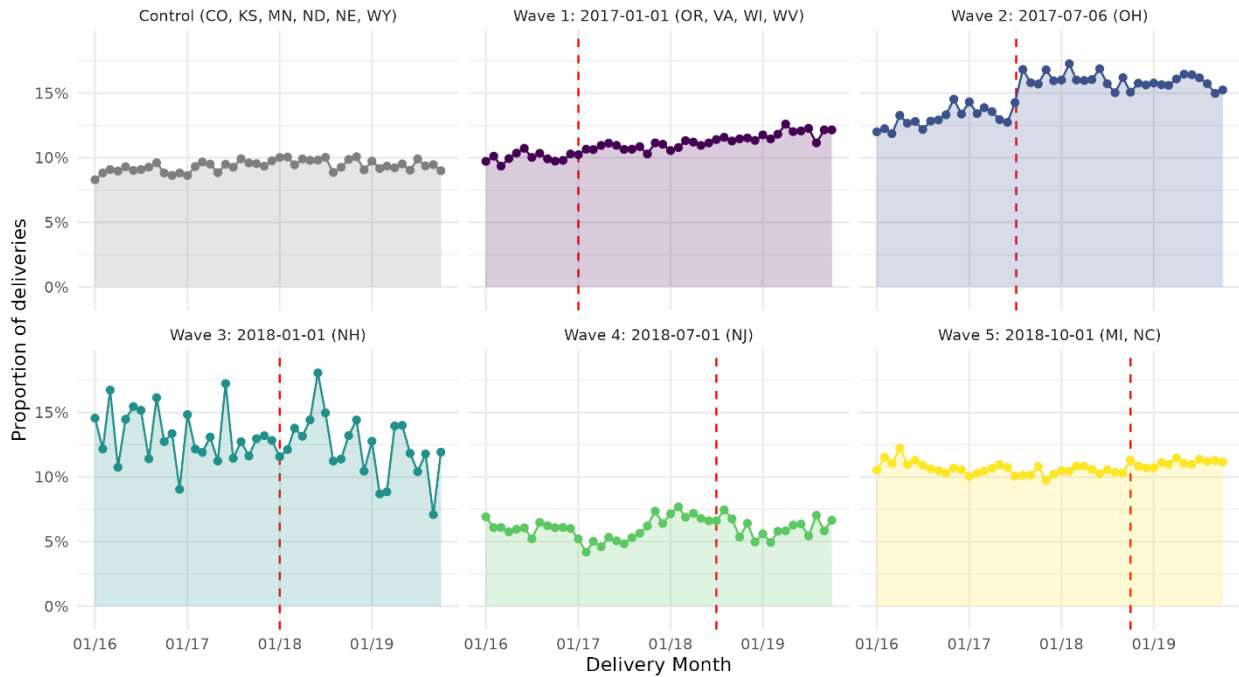

**Supplement Section 5. Assessing parallel pre-trends for IPP LARC**

One of the assumptions of the staggered difference-in-differences model is that changes over time in each policy wave would follow the same trend as changes over time in the control wave in the absence of treatment. We tested this assumption by estimating time trends for each wave in the pre-policy period using a linear model with interaction terms between policy wave and continuous months since the start of the study. These interaction terms allowed us to test whether those trends significantly differed from the time trend for the control group of states that did not receive the policy. Estimates for the difference in time trends from the control group for each wave and each outcome are presented below:

Supplement eTable 4. Differences in pre-policy trends of IPP LARC by wave

| Wave   | Estimate  | Std. Error | p-value |
|--------|-----------|------------|---------|
| Wave 1 | -0.00005  | 0.00013    | 0.665   |
| Wave 2 | 0.00137   | 0.00008    | <0.001  |
| Wave 3 | -0.00059  | 0.00007    | <0.001  |
| Wave 4 | -0.00007  | 0.00007    | 0.353   |
| Wave 5 | -0.000002 | 0.00008    | 0.979   |

## Supplement Section 6. Sensitivity Analysis for IPP LARC models

To assess the impact of our detrending, we ran a sensitivity analysis on our raw (un-detrended) outcomes. The ATE for the model of raw IPP LARC rates was 1.28 percentage points (95% CI: 0.85, 1.73), slightly higher than the detrended ATE of 0.74 percentage points (95% CI: 0.309, 1.184).

### Supplement eFigure 5. Estimated changes each month pre- and post-policy on use of raw IPP LARC rate

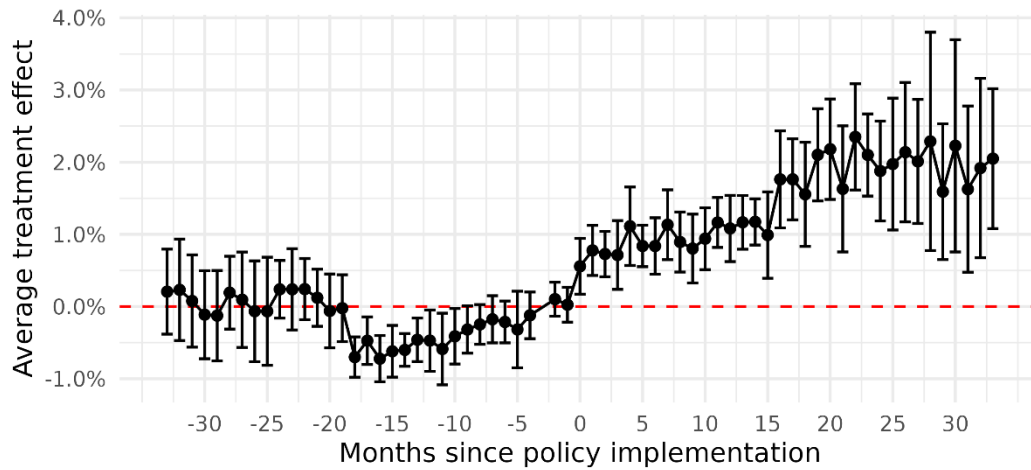

### Supplement eFigure 6. Estimated changes associated with the policy for each policy implementation wave on use of raw IPP LARC

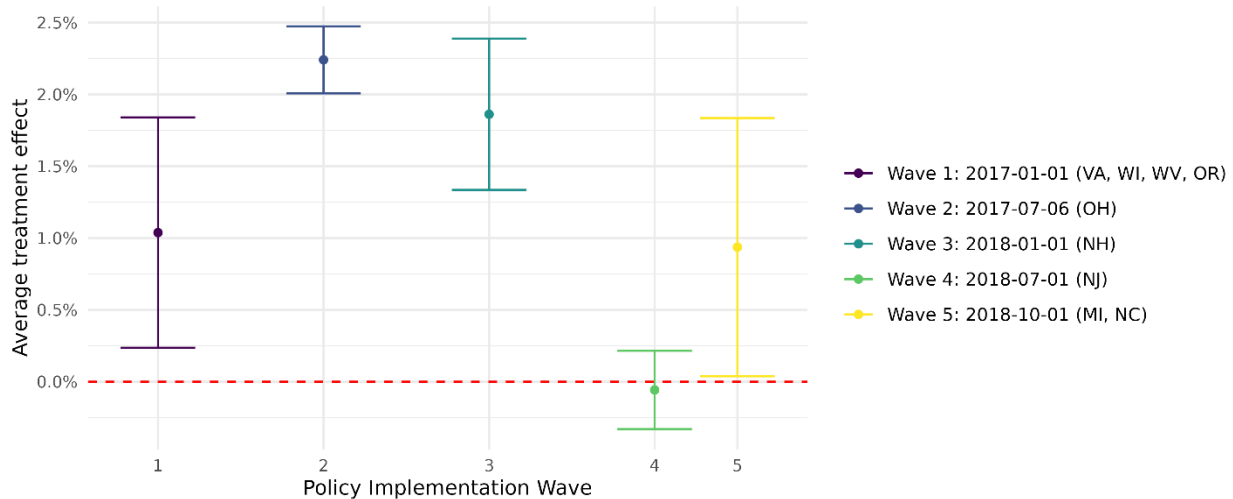



## Supplement Section 7. Month-stratified and wave-stratified results for secondary outcomes

### Supplement eFigure 7. Estimated changes each month pre- and post-policy on use of 60-day postpartum LARC

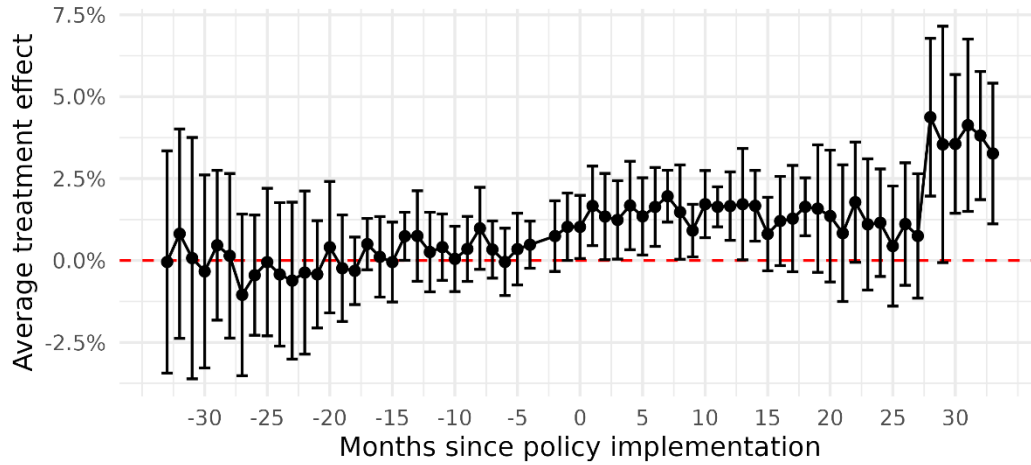

### Supplement eFigure 8. Estimated changes associated with the policy for each policy implementation wave on use of 60-day postpartum LARC

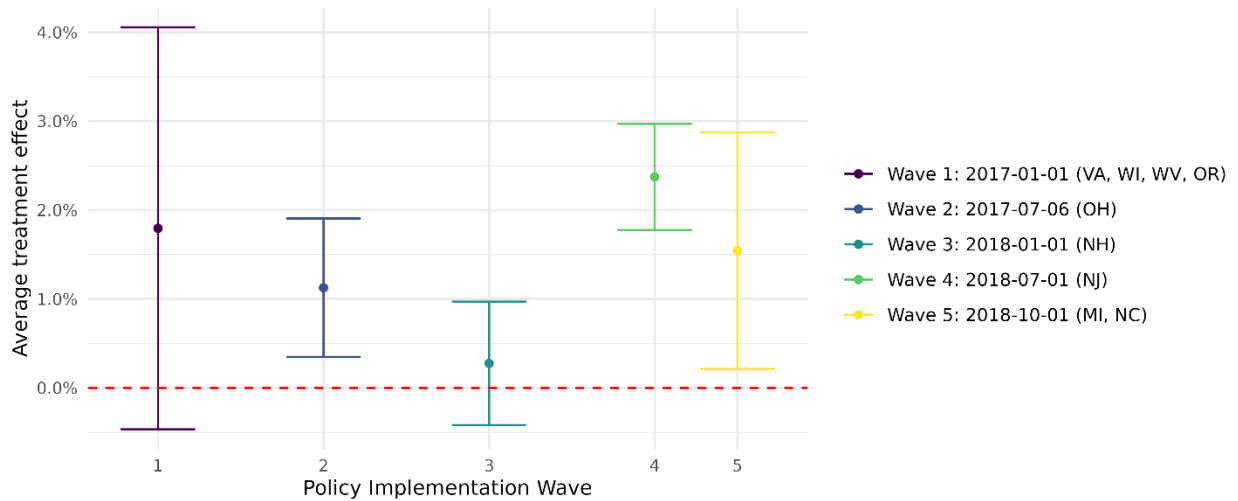

**Supplement eFigure 9. Estimated changes each month pre- and post-policy on use of 7-day postpartum sterilization**

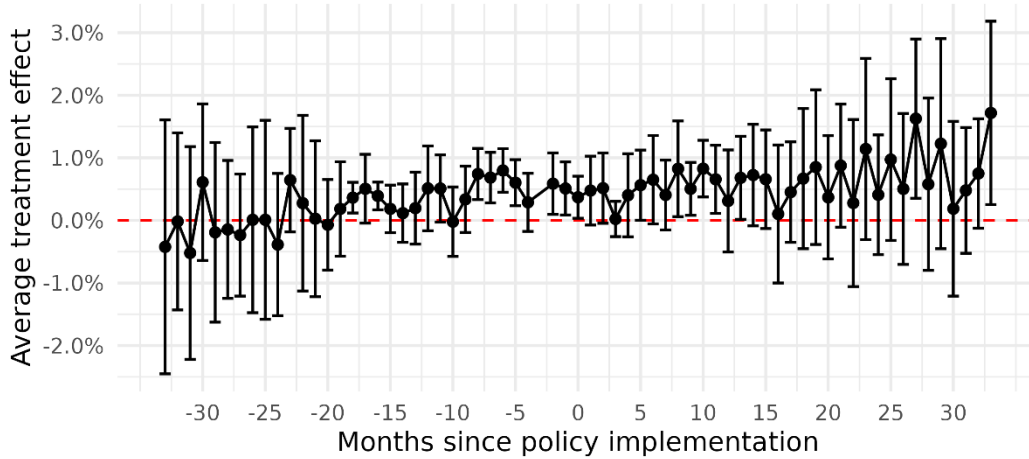

**Supplement eFigure 10. Estimated changes associated with the policy for each policy implementation wave on use of 7-day postpartum sterilization**

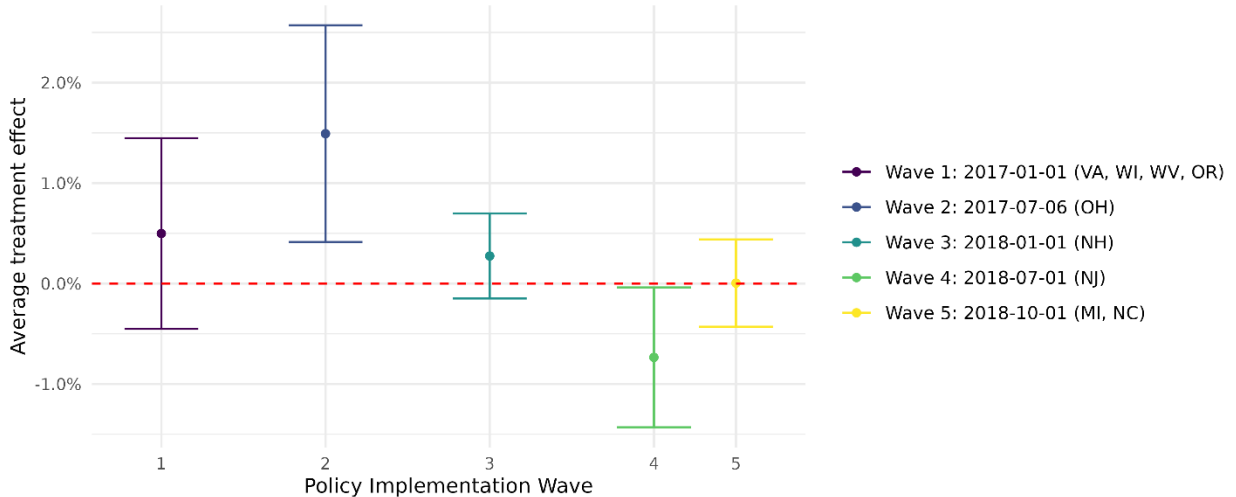

**Supplement eFigure 11. Estimated changes each month pre- and post-policy on use of 7-day postpartum most or moderately effective contraception**

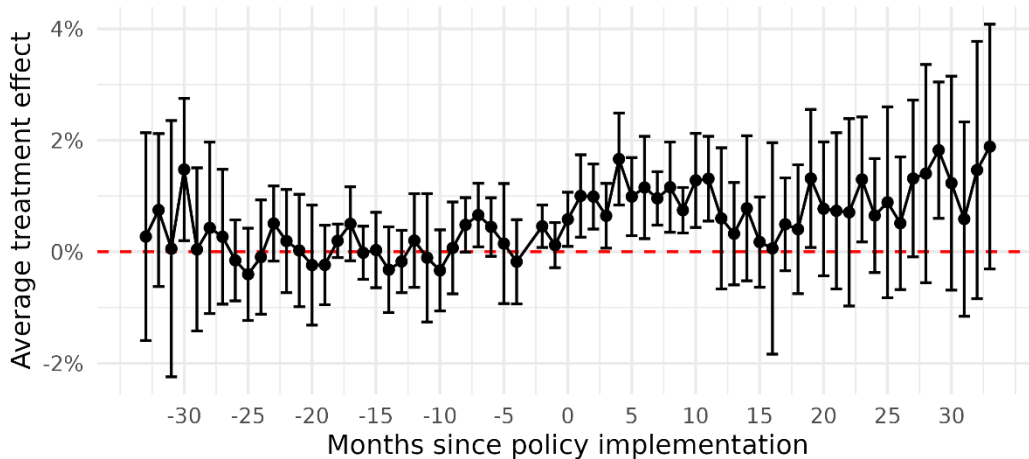

**Supplement eFigure 12. Estimated changes associated with the policy for each policy implementation wave on use of 7-day postpartum most or moderately effective contraception**

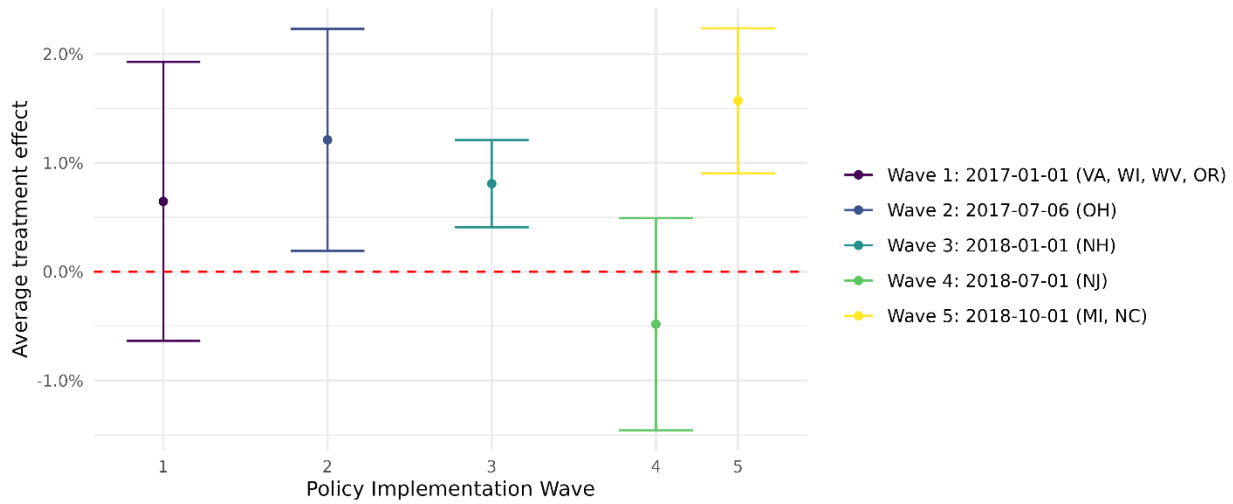

**Supplement Section 8. Assessing parallel pre-trends for Secondary Outcomes**

Supplement eTable 5. Differences in pre-policy trends of Interval LARC by wave

| Wave   | Estimate | Std. Error | p-value |
|--------|----------|------------|---------|
| Wave 1 | -0.00056 | 0.00035    | 0.115   |
| Wave 2 | 0.00132  | 0.00019    | <0.001  |
| Wave 3 | -0.00153 | 0.00012    | <0.001  |
| Wave 4 | -0.00035 | 0.00006    | <0.001  |
| Wave 5 | -0.00004 | 0.00023    | 0.081   |

Supplement eTable 6. Differences in pre-policy trends of 7-day postpartum sterilization by wave

| Wave   | Estimate | Std. Error | p-value |
|--------|----------|------------|---------|
| Wave 1 | -0.00028 | 0.00020    | 0.161   |
| Wave 2 | -0.00022 | 0.00019    | 0.250   |
| Wave 3 | -0.00057 | 0.00009    | <0.001  |
| Wave 4 | -        | 0.00007    | 0.966   |
|        | 0.000003 |            |         |
| Wave 5 | -0.00030 | 0.00018    | 0.099   |

Supplement eTable 7. Differences in pre-policy trends of 7-day postpartum most or moderately effective contraception by wave

| Wave   | Estimate | Std. Error | p-value |
|--------|----------|------------|---------|
| Wave 1 | 0.00009  | 0.00037    | 0.816   |
| Wave 2 | 0.00081  | 0.00026    | 0.002   |
| Wave 3 | -0.00077 | 0.00013    | <0.001  |

|        |          |         |       |
|--------|----------|---------|-------|
| Wave 4 | -0.00004 | 0.00011 | 0.708 |
| Wave 5 | -0.00053 | 0.00025 | 0.033 |

### Supplement Section 9. Sensitivity Analysis for Interval LARC models

To assess the impact of our detrending, we ran a sensitivity analysis on our raw (un-detrended) outcomes. The ATE for the model of raw Interval LARC rates was 1.56 percentage points (95% CI: 0.41, 2.71), almost the same as the detrended ATE of 1.58 percentage points (95% CI: 0.43, 2.73).

**Supplement eFigure 13. Estimated changes each month pre- and post-policy on use of raw IPP LARC rate**

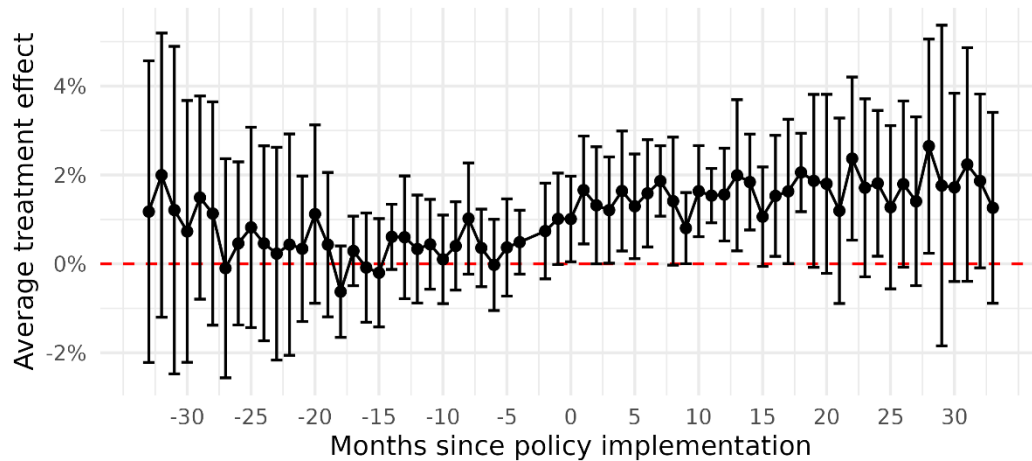

**Supplement eFigure 14. Estimated changes associated with the policy for each policy implementation wave on use of raw IPP LARC**

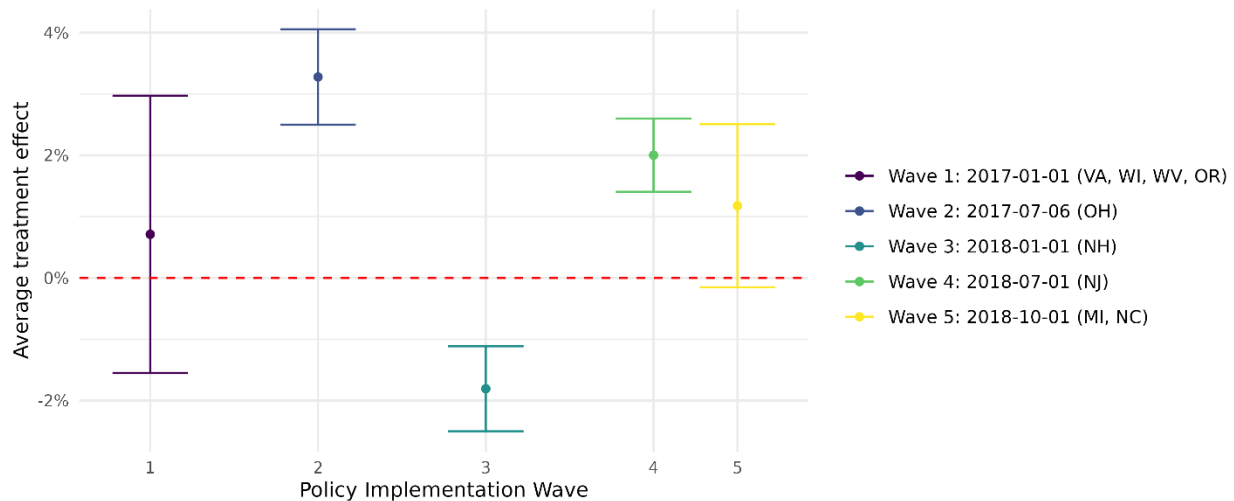

## Supplement Section 10. Sensitivity Analysis for 7-day postpartum sterilization models

To assess the impact of our detrending, we ran a sensitivity analysis on our raw (un-detrended) outcomes. The ATE for the model of raw 7-day postpartum sterilization rates was 0.18 percentage points (95% CI: -0.44, 0.81), slightly lower than the detrended ATE of 0.59 percentage points (95% CI: -0.03, 1.22).

### Supplement eFigure 15. Estimated changes each month pre- and post-policy on use of raw IPP LARC rate

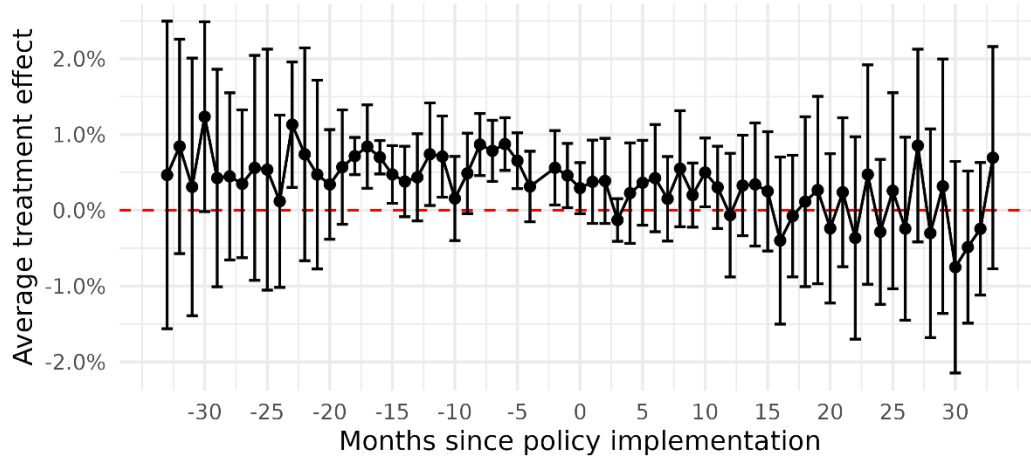

### Supplement eFigure 16. Estimated changes associated with the policy for each policy implementation wave on use of raw IPP LARC

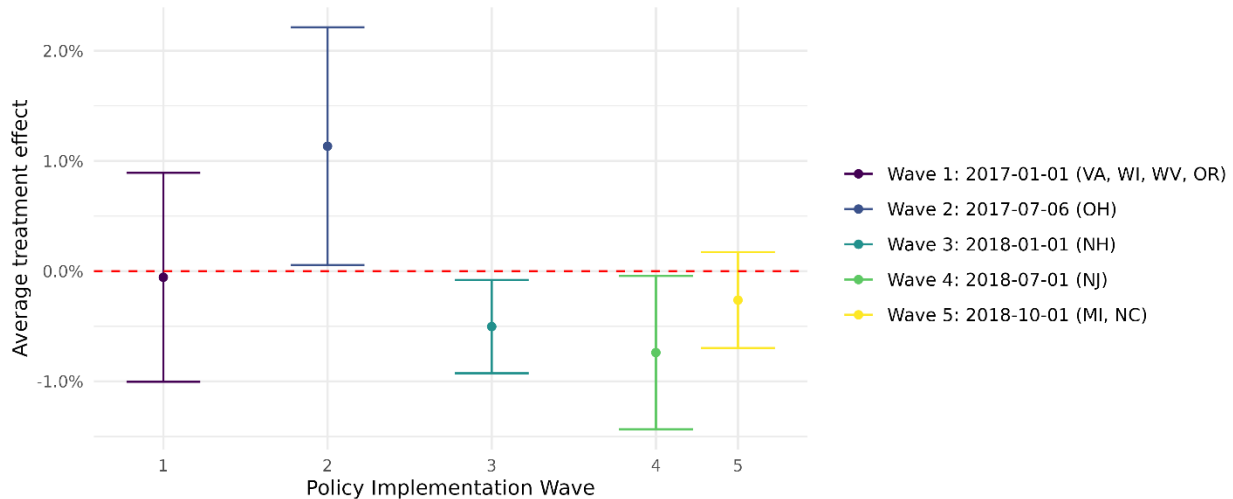

## Supplement Section 11. Sensitivity Analysis for 7-day postpartum most or moderately effective contraception models

To assess the impact of our detrending, we ran a sensitivity analysis on our raw (un-detrended) outcomes. The ATE for the model of raw 7-day postpartum most or moderately effective

contraception rates was 1.24 percentage points (95% CI: 0.45, 2.03), slightly higher than the detrended ATE of 0.92 percentage points (95% CI: 0.13, 1.71).

**Supplement eFigure 17. Estimated changes each month pre- and post-policy on use of raw IPP LARC rate**

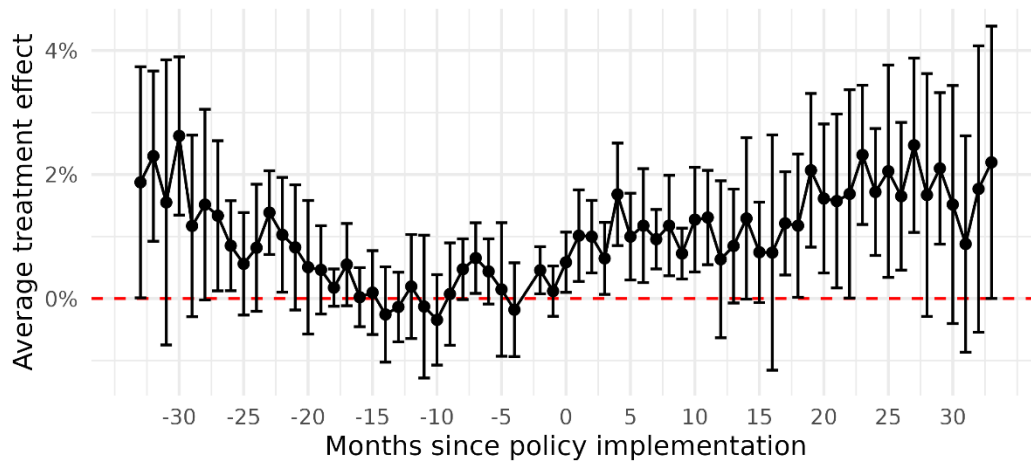

**Supplement eFigure 18. Estimated changes associated with the policy for each policy implementation wave on use of raw IPP LARC**

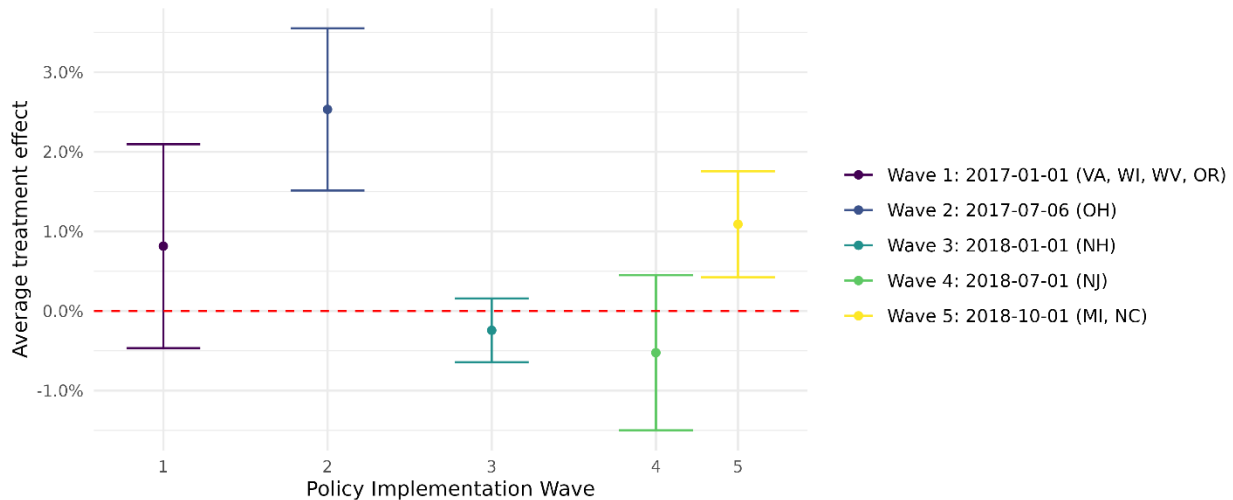

**Works Cited**

[1] Inventory of State-Level Medicaid Policies, Programs, and Initiatives to Improve Maternity Care and Outcomes. Medicaid and CHIP Payment and Access Commission. Accessed September 14, 2023. 7

[2] Center for Medicaid & CHIP Services, Center for Medicare and Medicaid Services, Department of Health and Human Services. CMCS Informational Bulletin: State Medicaid

Payment Approaches to Improve Access to Long-Acting Reversible Contraception. 2016. Accessed September 14, 2023. <https://www.medicaid.gov/sites/default/files/Federal-Policy-Guidance/Downloads/CIB040816.pdf>

[3] Medicaid Reimbursement for Postpartum LARC. American College of Obstetricians and Gynecologists. Accessed September 14, 2023. <https://www.acog.org/programs/long-acting-reversible-contraception-larc/activities-initiatives/medicaid-reimbursement-for-postpartum-larc>

[4] Ranji, U., Gomez, I., Salganicoff, A., Rosenzweig, C., Kellenberg, R., & Gifford, K. (2022, February 17). Medicaid coverage of family planning benefits: Findings from a 2021 state survey. KFF. <https://www.kff.org/report-section/medicaid-coverage-of-family-planning-benefits-findings-from-a-2021-state-survey-report/>

[5] Walls, J., Gifford, K., Ranji, U., Salganicoff, A., & Gomez, I. (2016, September 15). Medicaid coverage of family planning benefits: Results from a state survey. KFF. <https://www.kff.org/report-section/medicaid-coverage-of-family-planning-benefits-results-from-a-state-survey-reversible-contraception/>

[6] Centers for Medicare and Medicaid Services. DQ atlas. Accessed September 14, 2023. <https://www.medicaid.gov/dq-atlas/>

[7] Abraham S SL. Estimating Dynamic Treatment Effects in Event Studies with Heterogeneous Treatment Effects. *Journal of Econometrics*. 2021;225.
