# Supplementary material for: Medicaid Policy Change and Immediate Postpartum Long-Acting Reversible Contraception
Source: PubMed Central journal article supplement (PMC11161841; doi:10.1001/jamahealthforum.2024.1359), 2024-06-07
Supplement: jamahealthforum-e241359-s003.pdf [file jamahealthforum-e241359-s003.pdf]

## Data Sharing Statement

Rodriguez. Medicaid Policy Change and Immediate Postpartum Long-Acting Reversible Contraception. *JAMA Health Forum*. Published June 07, 2024.

doi:10.1001/jamahealthforum.2024.1359

### Data

**Data available:** No

### Additional Information

**Explanation for why data not available:** This is not allowed under our data use agreement
